# Supplementary material for: Adaptive advantages of restorative RNA editing in fungi for resolving survival-reproduction trade-offs
Source: PubMed Central journal article supplement — Sci Adv. 2024 Jan 5;10(1):eadk6130. doi: 10.1126/sciadv.adk6130 (PMC10776026; doi:10.1126/sciadv.adk6130), 2024-01-05
Supplement: sciadv.adk6130_sm.pdf [file sciadv.adk6130_sm.pdf]

Supplementary Materials for  
**Adaptive advantages of restorative RNA editing in fungi for resolving  
survival-reproduction trade-offs**

Zhaomei Qi *et al.*

Corresponding author: Huiquan Liu, liuhuiquan@nwsuaf.edu.cn

*Sci. Adv.* **10**, eadk6130 (2024)  
DOI: 10.1126/sciadv.adk6130

**The PDF file includes:**

Figs. S1 to S10  
Legends for tables S1 to S6  
References

**Other Supplementary Material for this manuscript includes the following:**

Tables S1 to S6

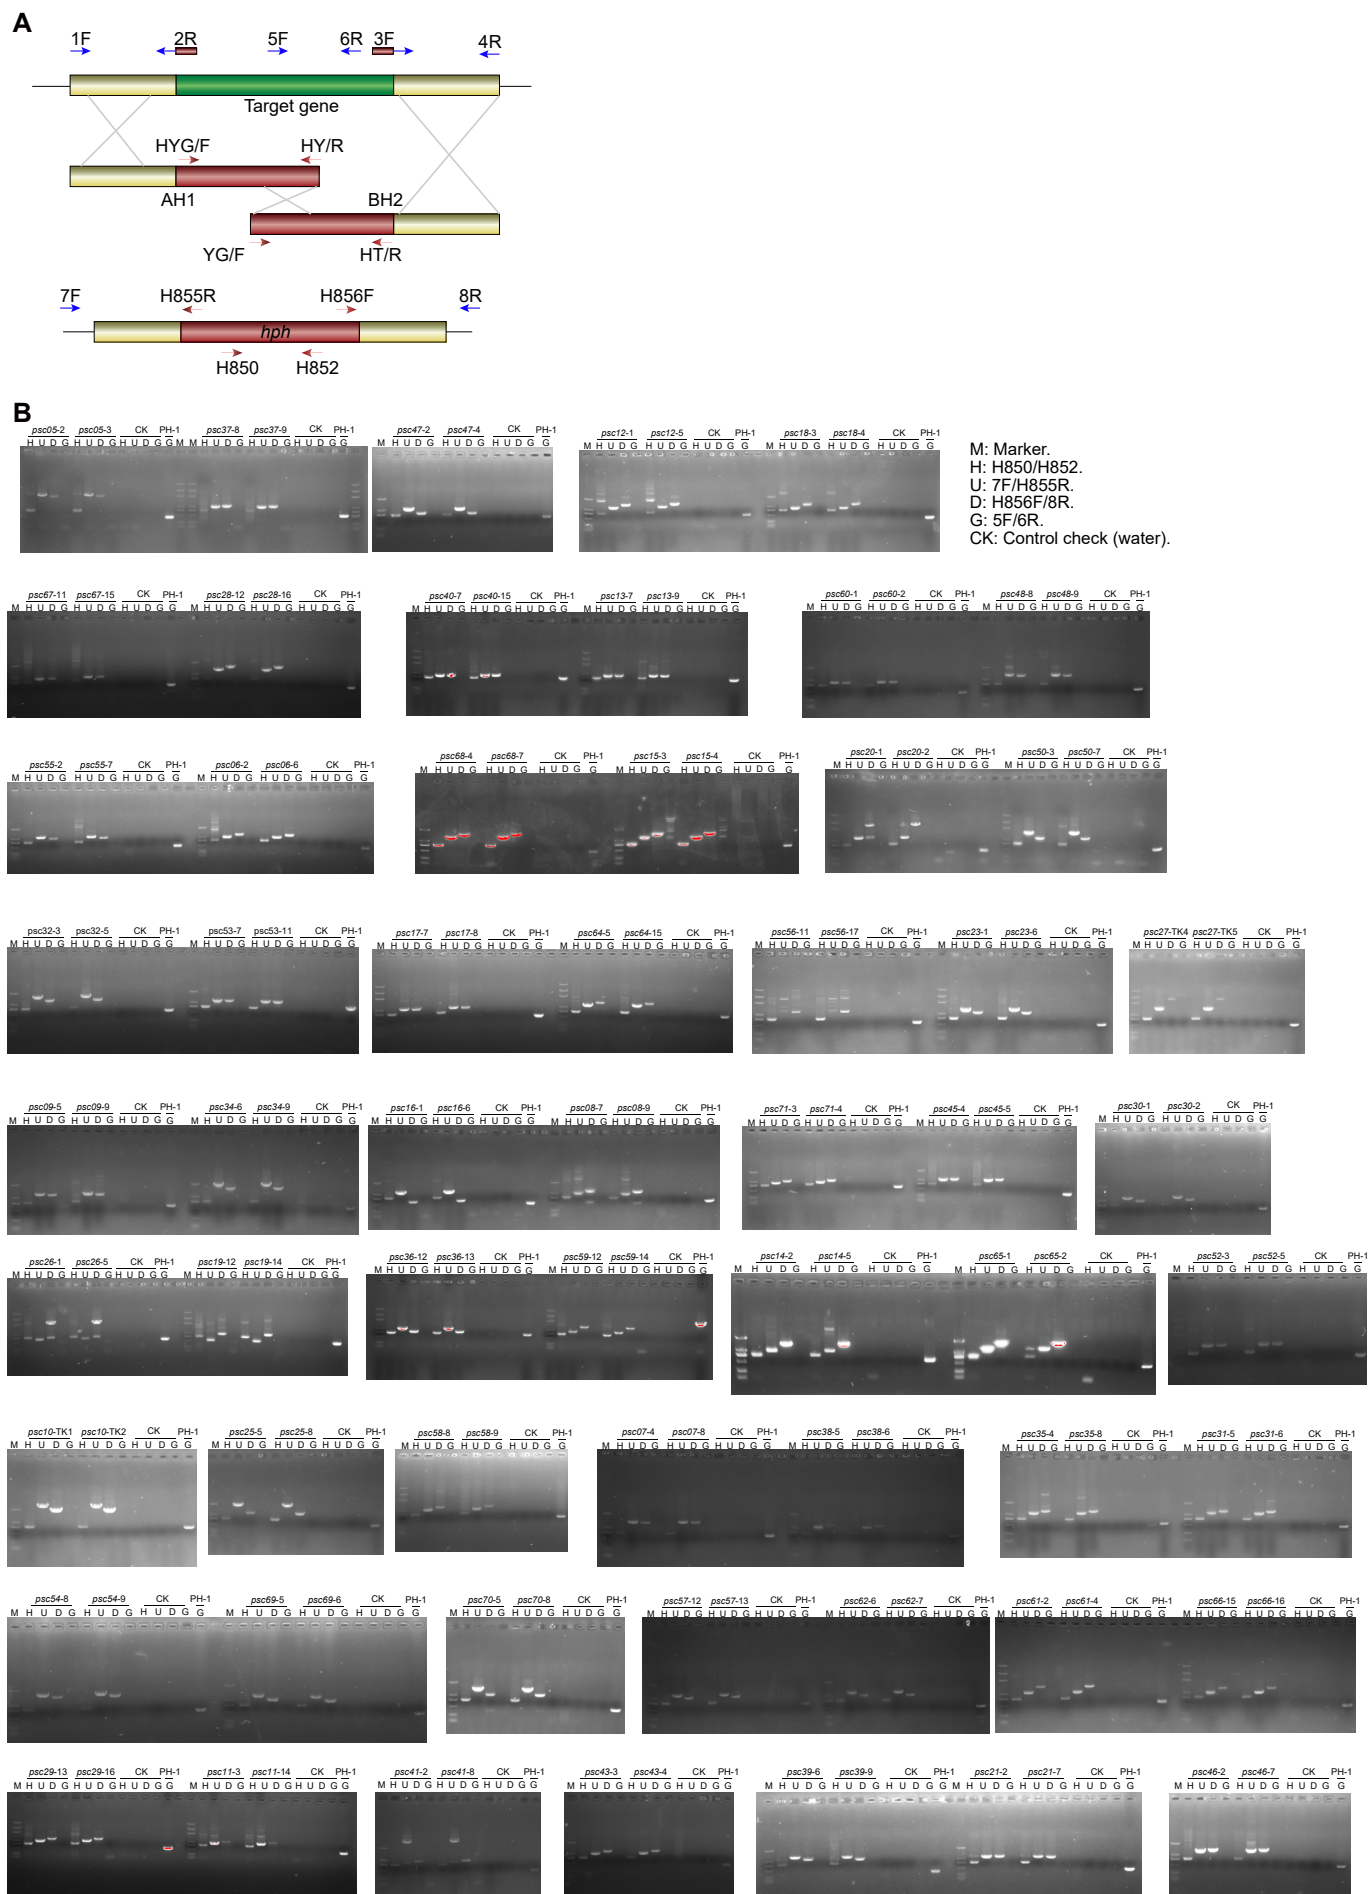

**Fig. S1. The gene deletion strategy and PCR analysis of the deletion mutants of *PSC* pseudogenes. (A)** Graphical representation of the split-marker approach used to replace the target gene with the hygromycin phosphotransferase (*hph*) cassette in this study. The location of PCR primers (F, forward and R, reverse) is indicated. **(B)** Confirming the deletion mutants of *PSC* pseudogenes by PCR analysis.

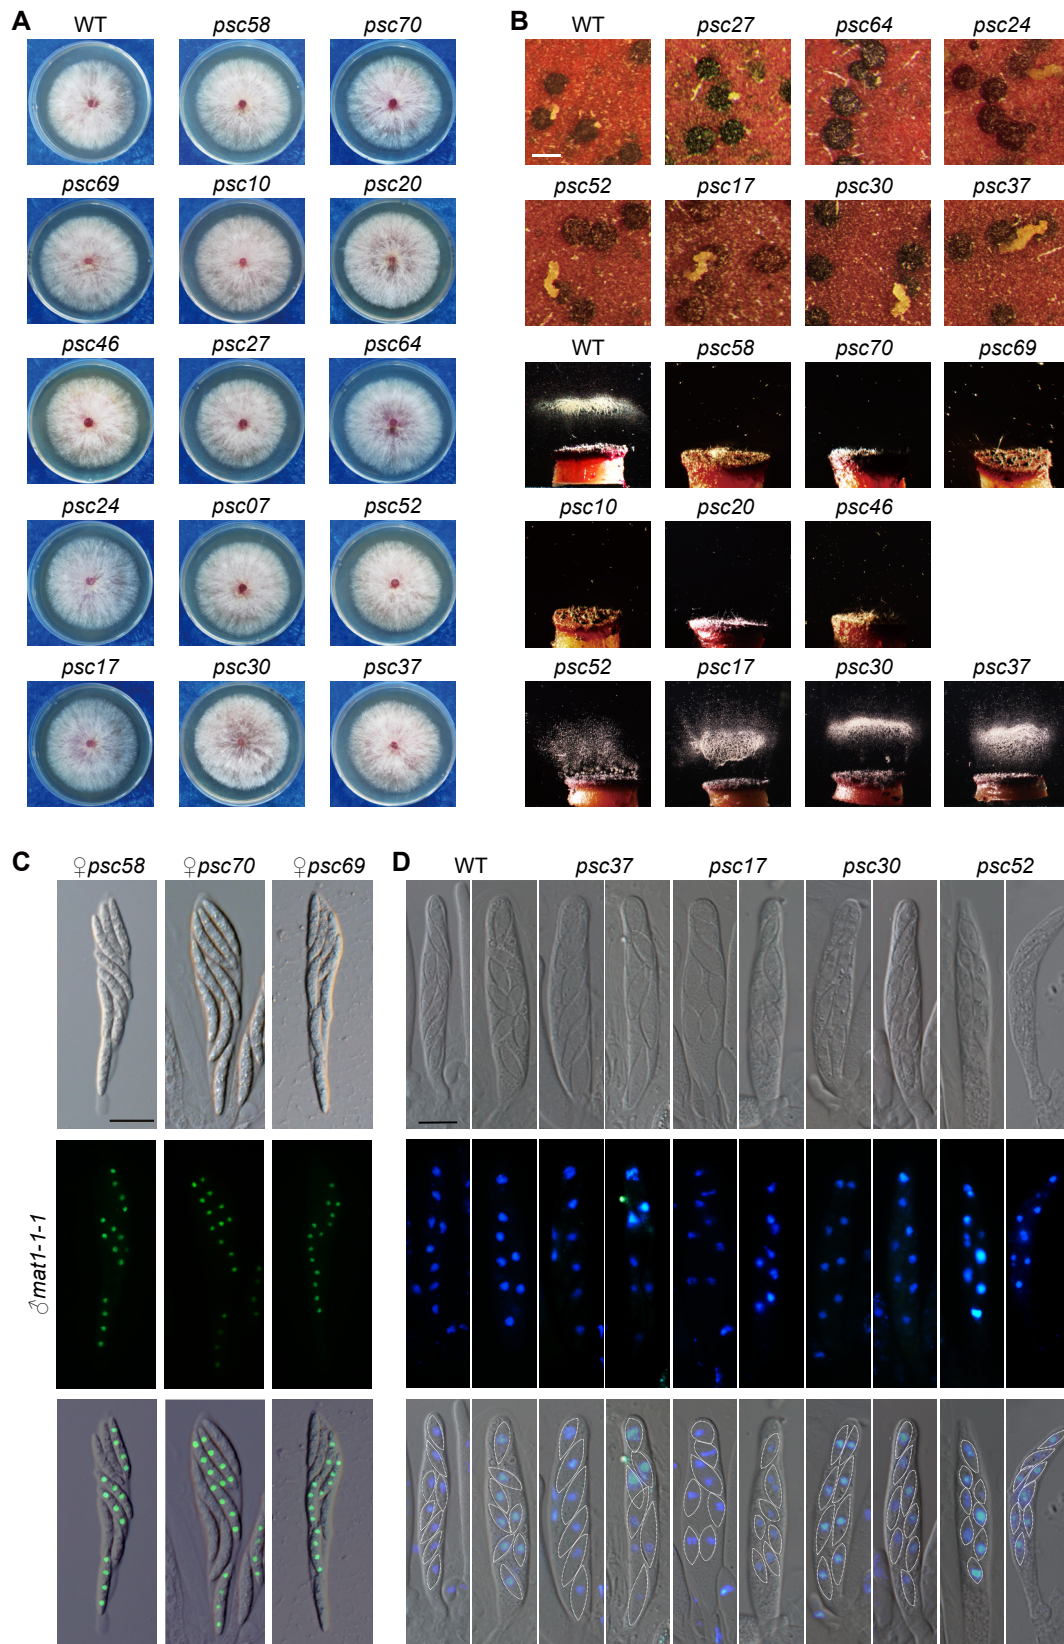

**Fig. S2. Phenotypes of deletion mutants of PSC pseudogenes.** (A) Three-day-old PDA cultures of PH-1 (WT) and the marked deletion mutants were examined for colony morphology. (B) The 7-dpf mating cultures of PH-1 (WT) and the marked deletion mutants were examined for perithecius formation (bar = 0.2 mm) and ascospore discharge. (C) Morphology of ascospores from crosses of the marked strains (♀) with the *mat1-1-1* H1-GFP (♂). Eight ascospores in each ascus showed 1:1 segregation for GFP signals. Bar = 20  $\mu$ m. (D) Asci of the marked strains stained with DAPI and examined by epifluorescence microscopy at 6 dpf. The delimitation of ascospores is marked with white dashed lines. Bar = 20  $\mu$ m.

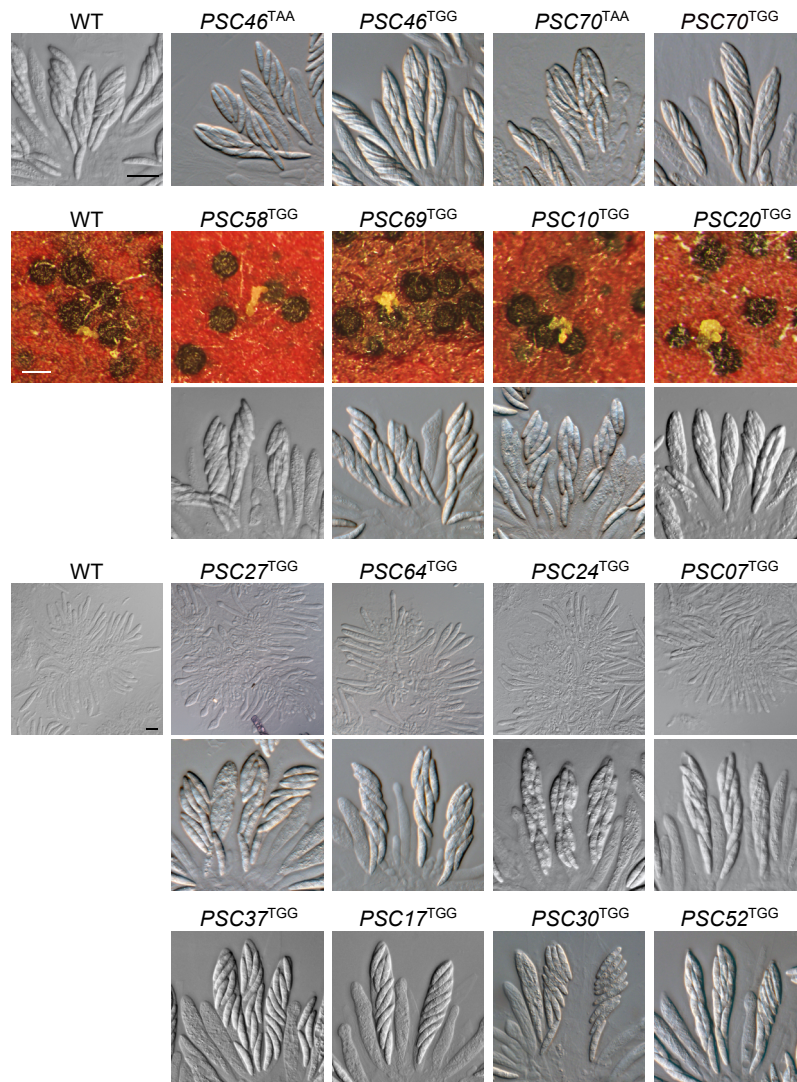

**Fig. S3. Normal phenotypes of the edited (TGG) transformants of germ-needed PSC pseudogenes in sexual development.** Mating cultures of the marked transformants were examined for perithecium formation (Bar = 0.2 mm) and/or asci and ascospores morphology (Bar = 20  $\mu$ m) at 7 dpf.

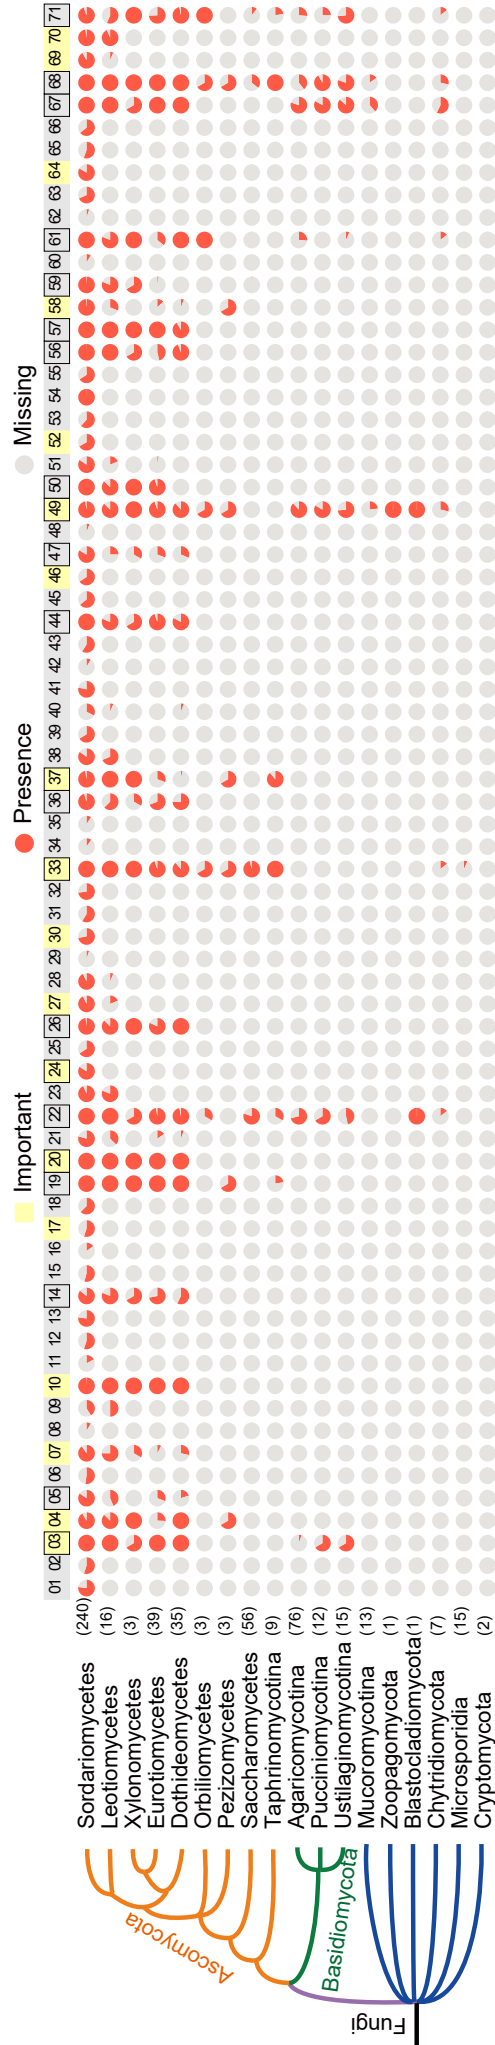

**Fig. S4. Distribution of the orthologous genes of the 71 PSC pseudogenes in the fungal tree of life.** The number of species in each taxon examined is indicated in the bracket. Each pie chart shows the proportion of fungal species with (presence) or without (missing) an ortholog. The names of the PSC pseudogenes with only detectable homologs in Pezizomycotina are boxed. The names of the 18 germ-needed PSC pseudogenes are highlighted by a yellow background.

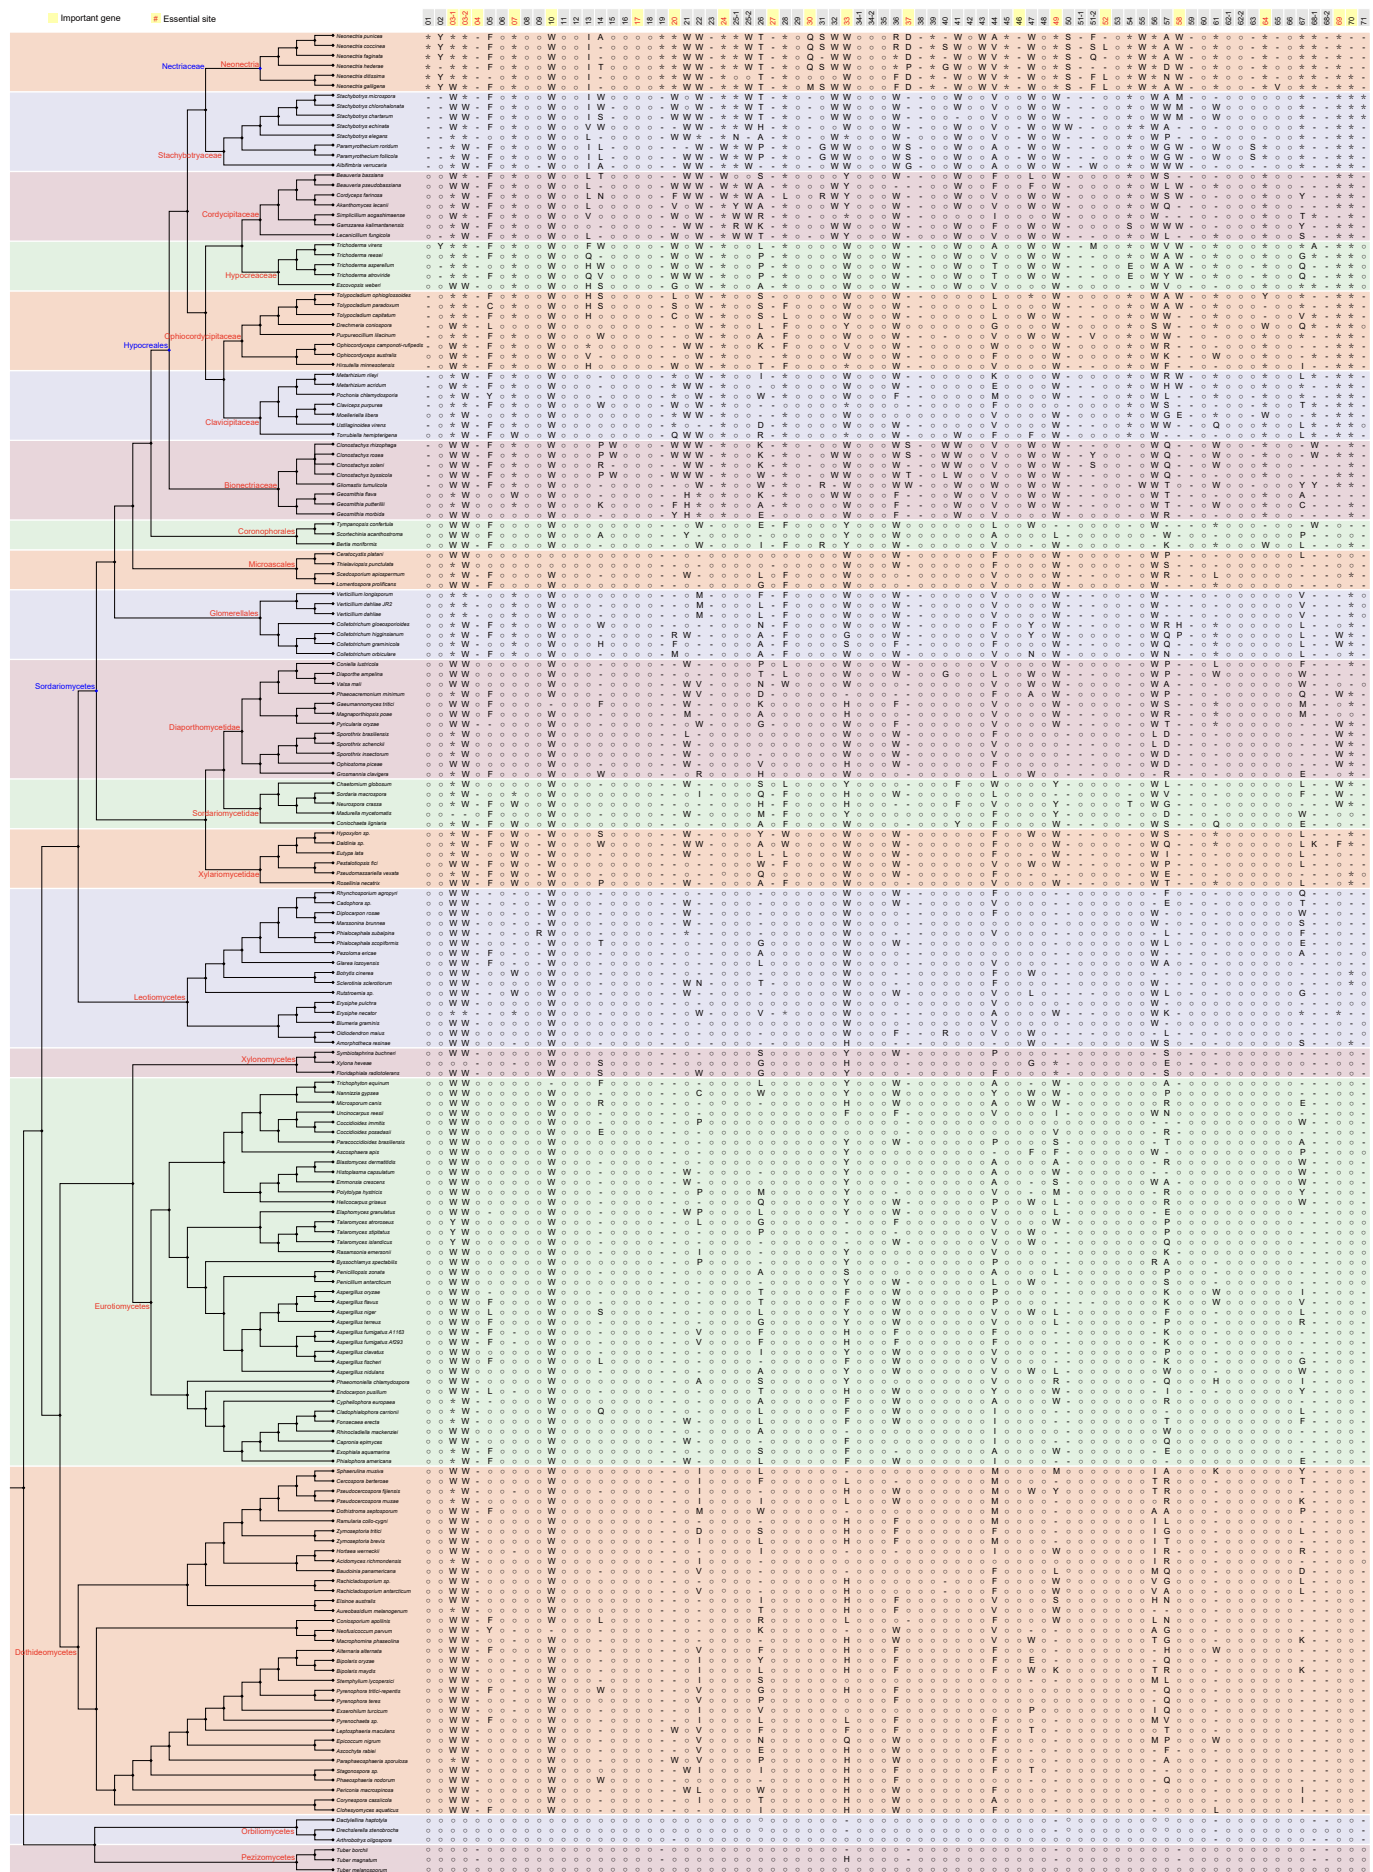

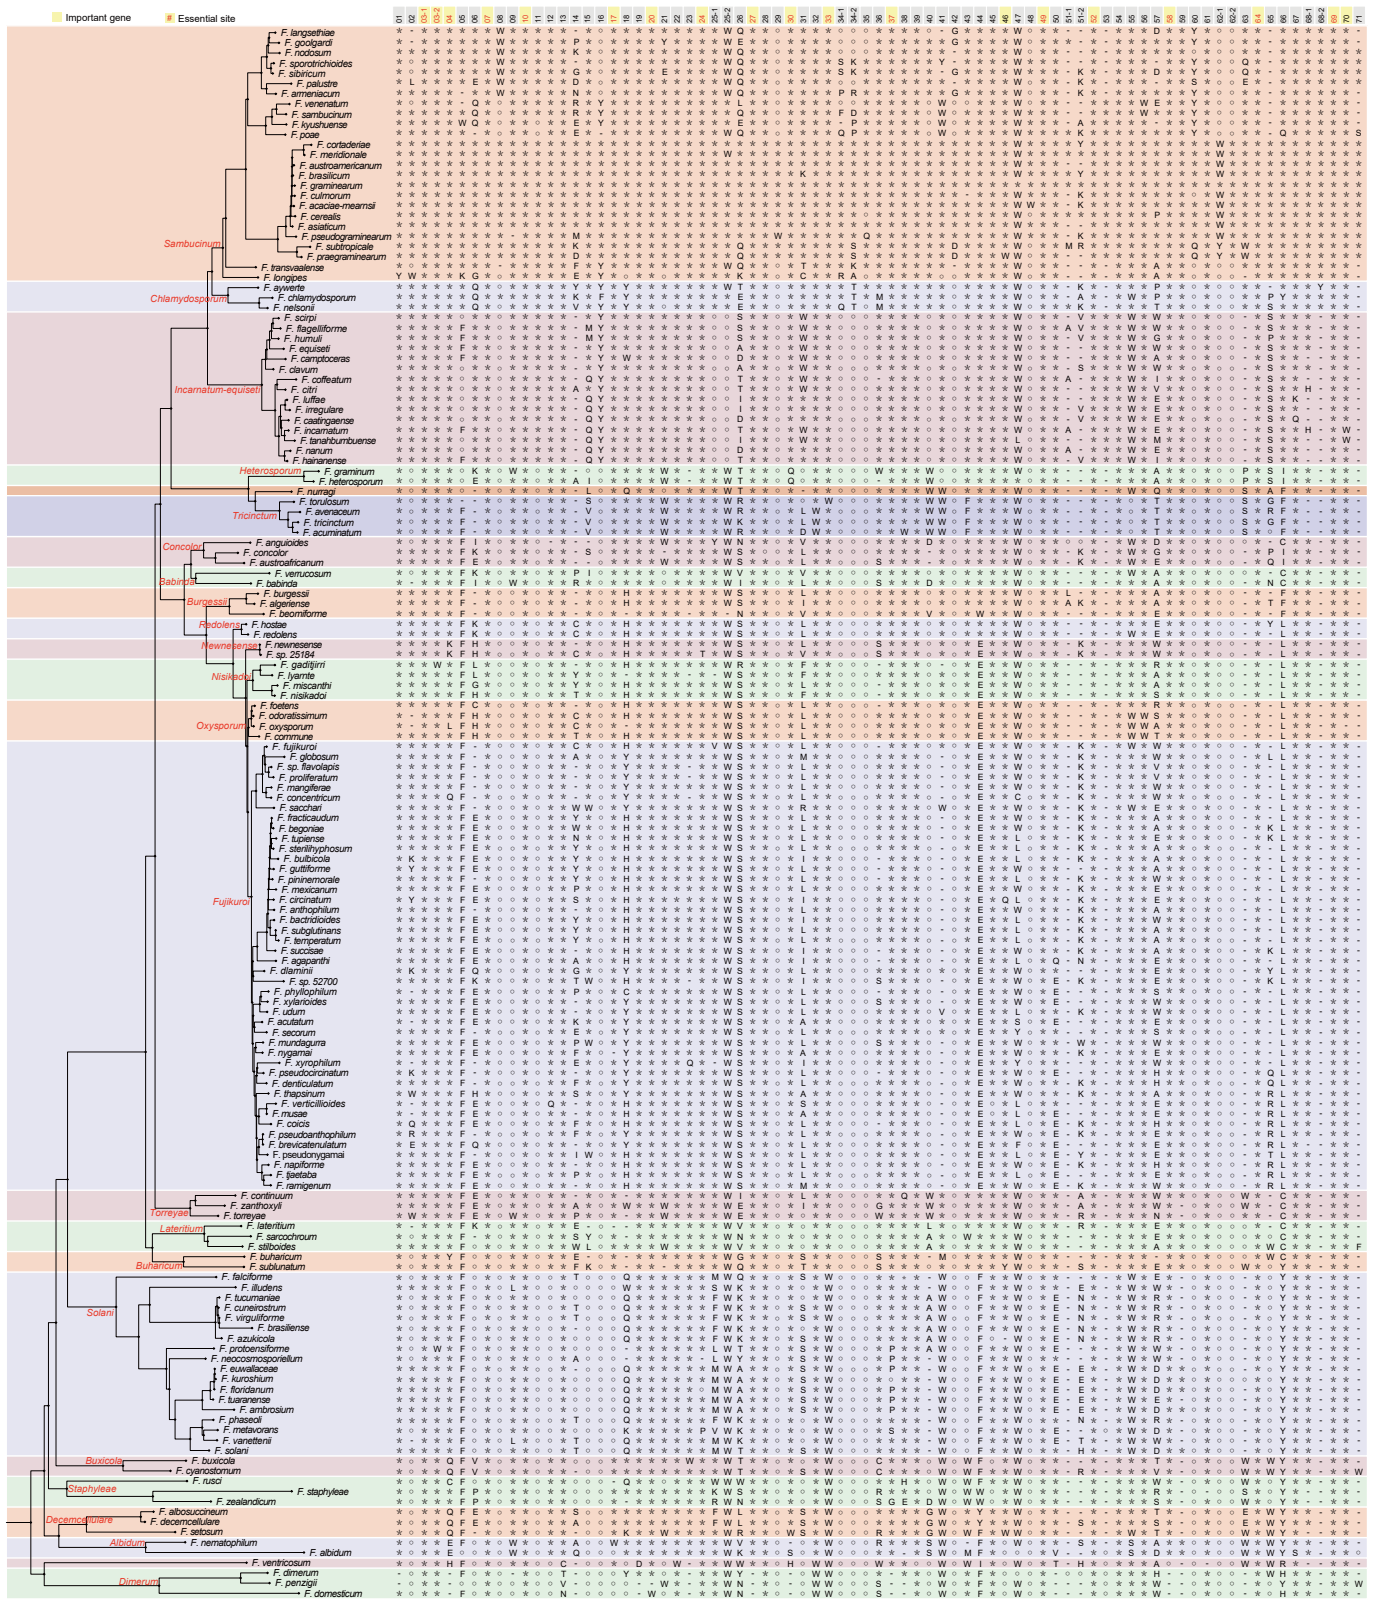

**Fig. S6. Amino acid states at the PSC editing sites in the orthologous genes of the 71 PSC pseudogenes in 154 genomes of *Fusarium*.** The names of the 18 germ-needed PSC pseudogenes and the PSC editing sites essential for their functions are highlighted by a yellow background and red font, respectively. The one-letter symbol of amino acid residues at the PSC editing sites in each genome is shown. \*, premature-stop codon TAG; -, missing the PSC editing site/region; o, missing the orthologous gene. The name of species complexes is indicated on the phylogenetic tree.

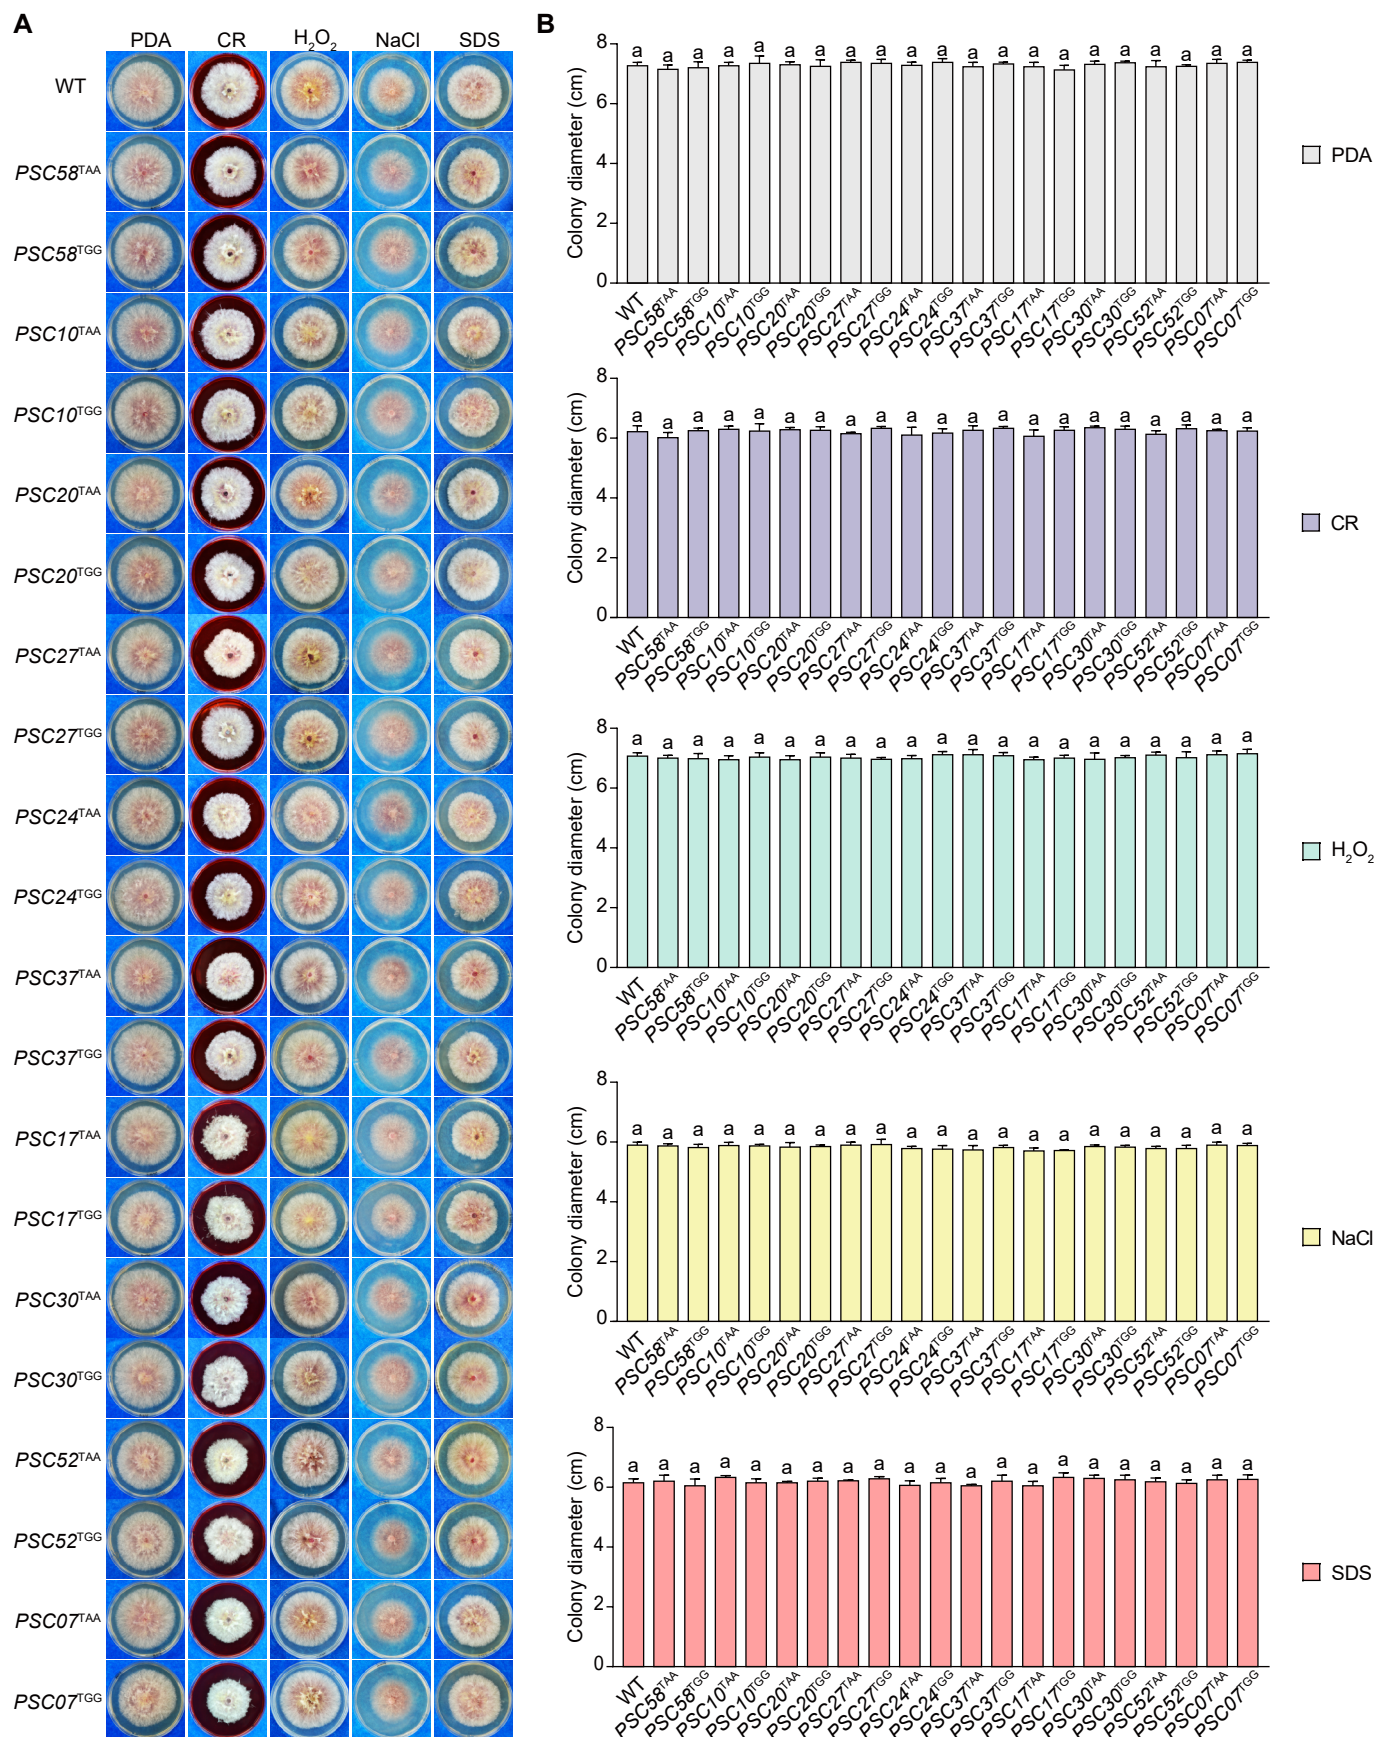

**Fig. S7. Colonial morphology and growth rates of the uneditable (TAA) and edited (TGG) transformants under stressful conditions.** (A) Colonies of PH-1 (WT) and the marked strains formed on PDA with or without 150  $\mu\text{g/ml}$  Congo red, 0.05%  $\text{H}_2\text{O}_2$ , 0.7 M NaCl, and 0.01% SDS after incubation for 3 or 5 days. (B) Colony diameters of the marked strains. Mean and SD were calculated with data from three biological replicates ( $N = 3$ ). The same letters indicate no significant differences based on one-way ANOVA followed by Turkey's multiple range test ( $P > 0.05$ ).

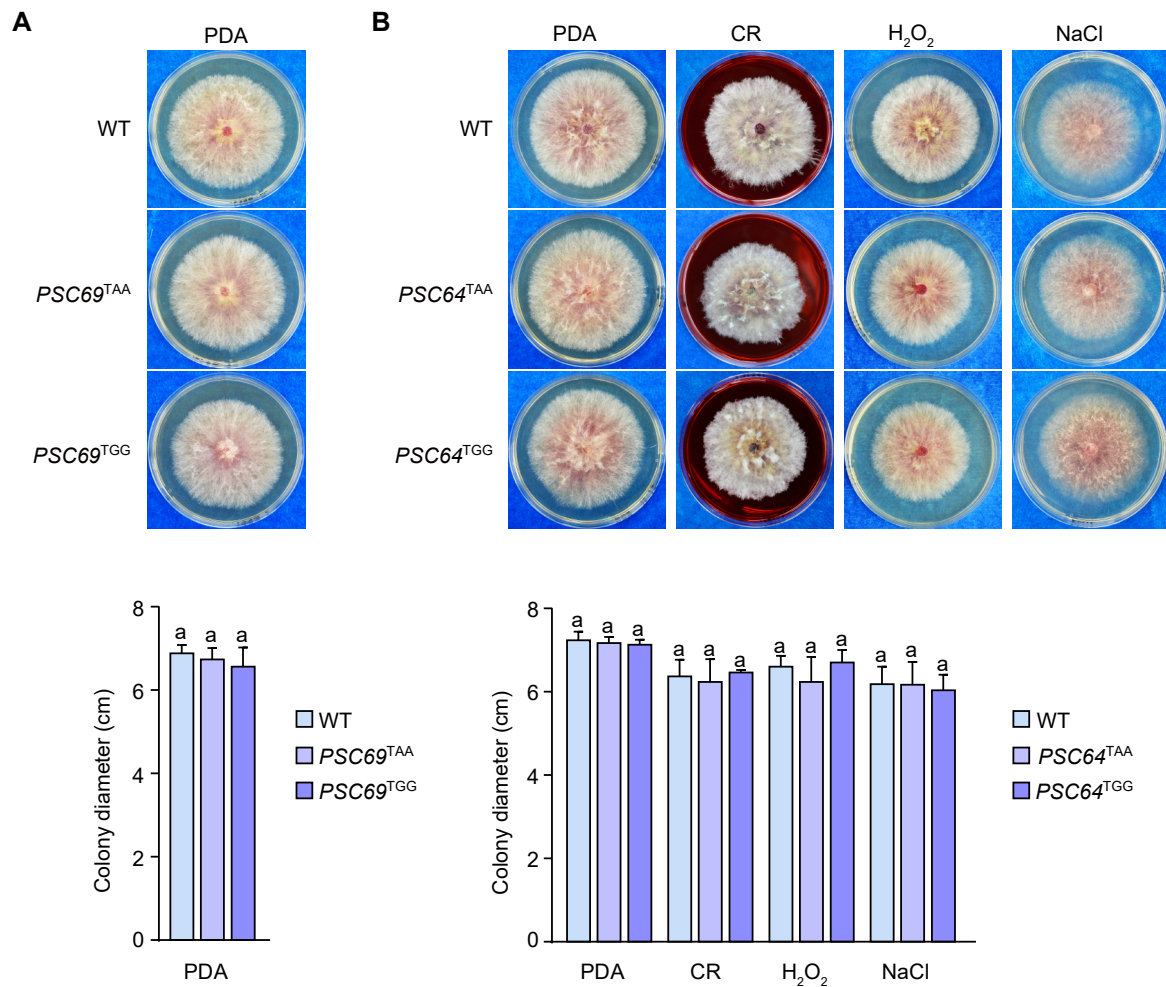

**Fig. S8. Colonial morphology and growth rates of the uneditable (TAA) and edited (TGG) transformants of *PSC69* and *PSC64* under stressful conditions.** (A) Colony morphology and colony diameters of PH-1 (WT) and the uneditable (TAA) and edited (TGG) transformants of *PSC69* formed on PDA plates after incubation for 3 days. (B) Colony morphology and colony diameters of PH-1 (WT) and the uneditable (TAA) and edited (TGG) transformants of *PSC64* formed on PDA with or without 150  $\mu$ g/ml Congo red, 0.05% H<sub>2</sub>O<sub>2</sub>, and 0.7 M NaCl after incubation for 3 or 5 days. Mean and SD were calculated with data from three biological replicates (N = 3). Same letters indicate no significant differences based on one-way ANOVA followed by Turkey's multiple range test ( $P > 0.05$ ).

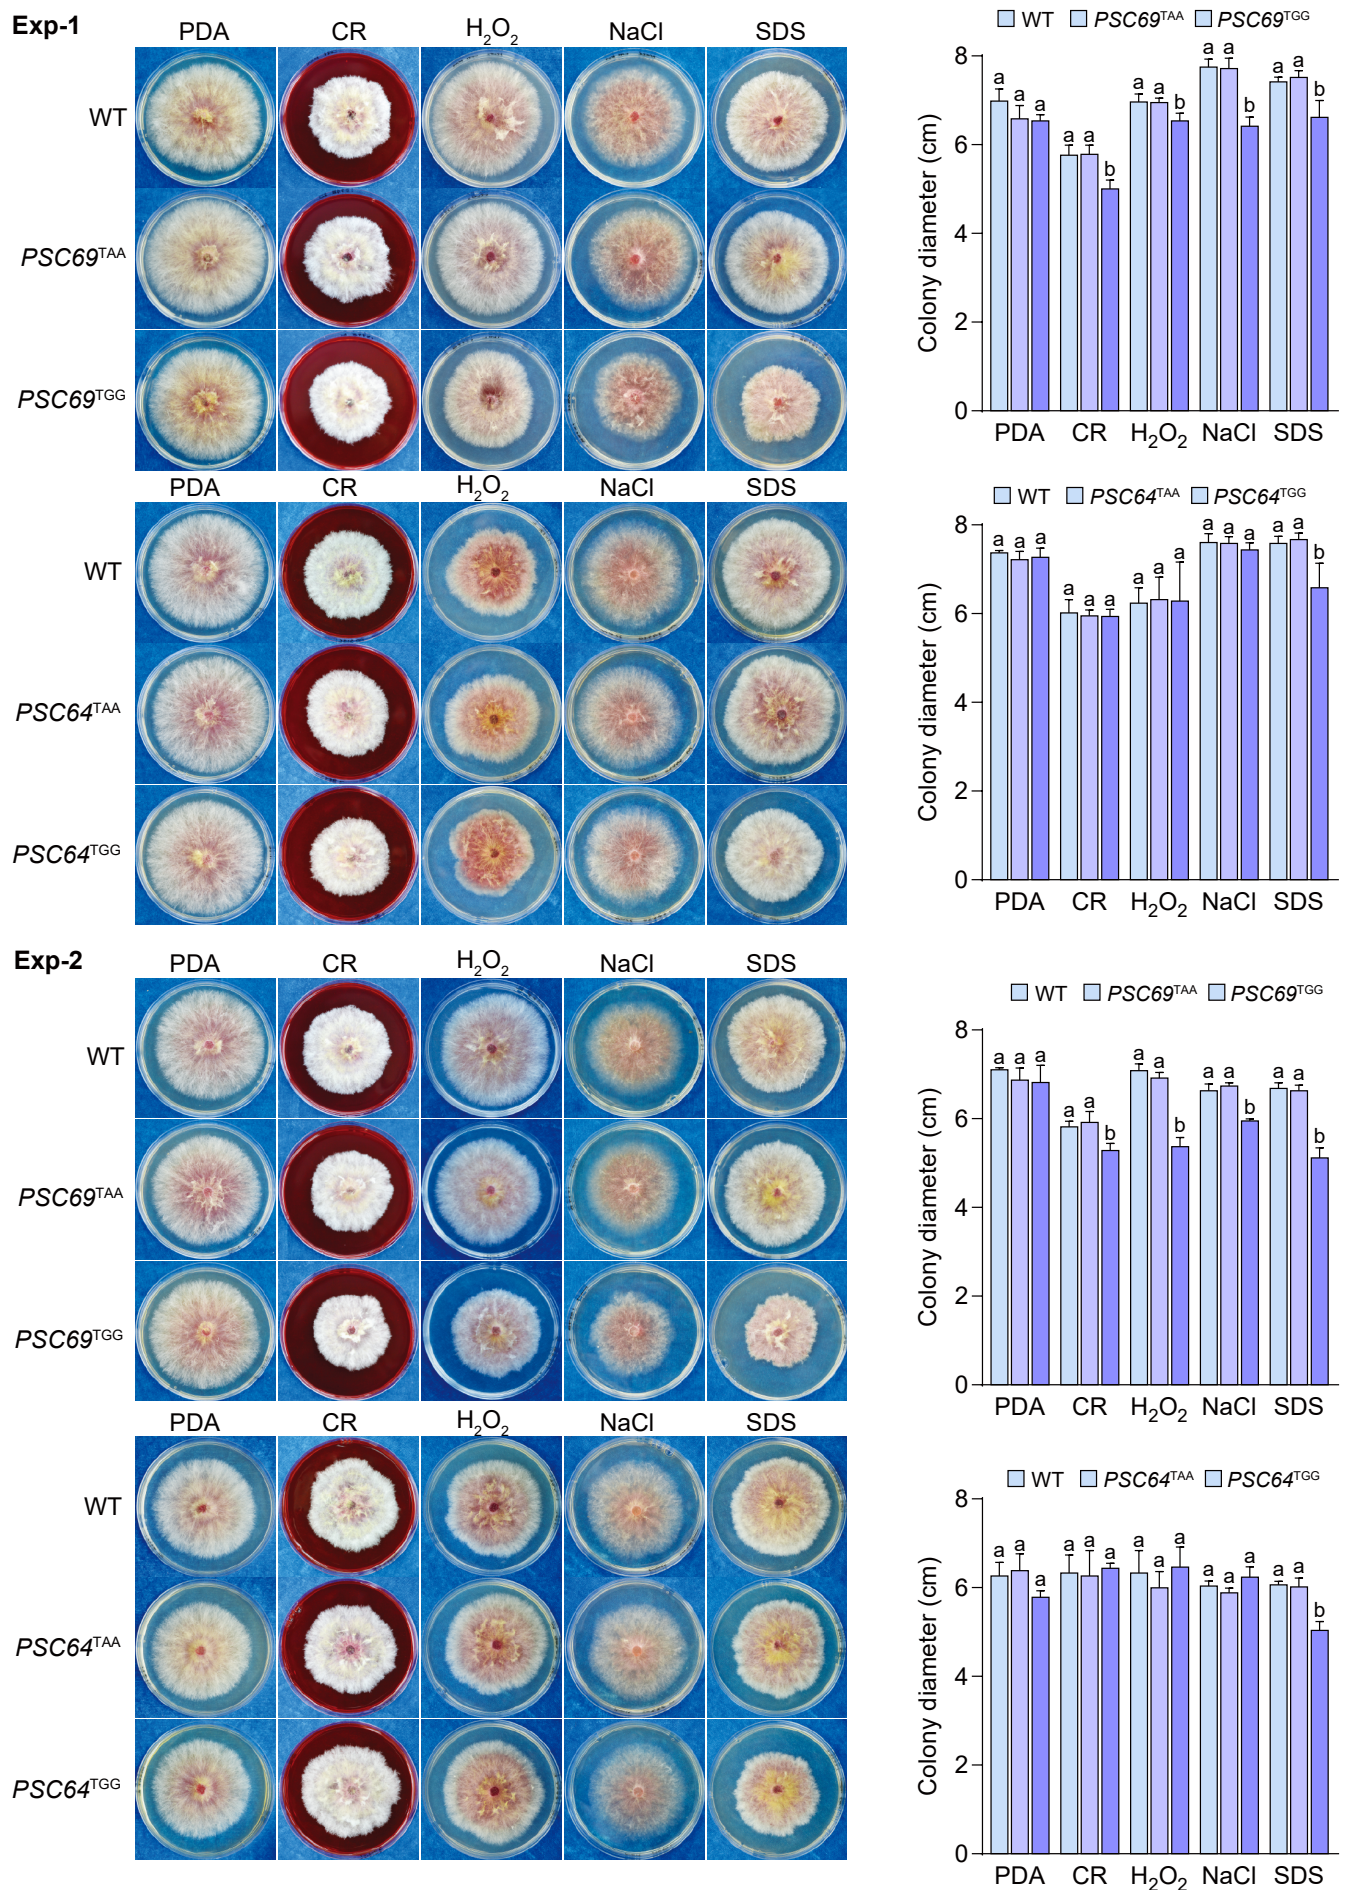

**Fig. S9. Colonial morphology and growth rates of the uneditable (TAA) and edited (TGG) transformants of *PSC69* and *PSC64* under stressful conditions assayed in additional two independent experiments.** Colonies of PH-1 (WT) and the marked strains formed on PDA with or without 150 µg/ml Congo red, 0.05% H<sub>2</sub>O<sub>2</sub>, 0.7 M NaCl, and 0.01% SDS after incubation for 3 or 5 days. Mean and SD were calculated with data from three biological replicates (N = 3). Different letters indicate significant differences based on one-way ANOVA followed by Turkey's multiple range test ( $P < 0.05$ ).

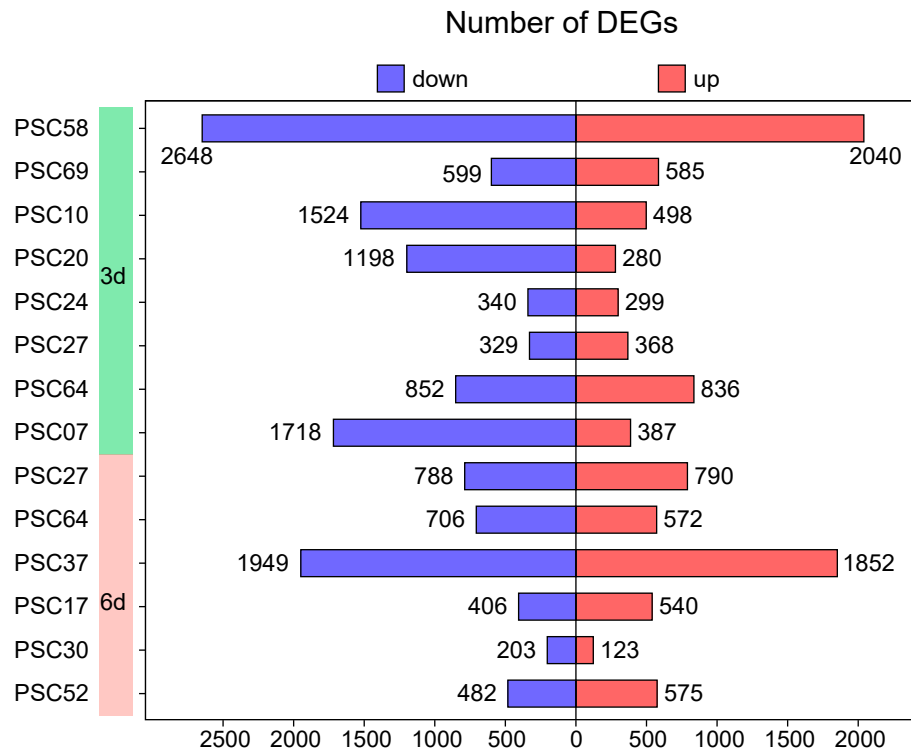

**Fig. S10. Number of differentially expressed genes (DEGs) identified in deletion mutants of the marked PSC pseudogenes.** 3d, 3-dpf perithecia; 6d, 6-dpf perithecia. down, down-regulated genes; up, up-regulated genes. Genes with  $FDR < 0.05$  and  $|\log_2(\text{fold-change})| \geq 1$  were considered as DEGs. The number of down- and up-regulated genes in each sample is indicated.

**Table S1-S6 (separate file)**

**Table S1. Information of the 71 PSC pseudogenes in *Fusarium graminearum*.**

**Table S2. Strains used in this study.**

**Table S3. Phenotypic description of deletion mutants of 71 PSC pseudogenes.**

**Table S4. The identified synonymous and nonsynonymous editing sites shared by *Fusarium graminearum* and *Fusarium neocosmosporiellum*.**

**Table S5. Primers used in this study.**

**Table S6. Information of Illumina DNA- and RNA-Seq data used in this study.**

## REFERENCES AND NOTES

1. J. Lukes, B. Kaur, D. Speijer, RNA editing in mitochondria and plastids: Weird and widespread. *Trends Genet.* **37**, 99–102 (2021).
2. Z. Bian, Y. Ni, J. R. Xu, H. Liu, A-to-I mRNA editing in fungi: Occurrence, function, and evolution. *Cell. Mol. Life Sci.* **76**, 329–340 (2019).
3. E. Eisenberg, E. Y. Levanon, A-to-I RNA editing - immune protector and transcriptome diversifier. *Nat. Rev. Genet.* **19**, 473–490 (2018).
4. R. Benne, J. Van den Burg, J. P. Brakenhoff, P. Sloof, J. H. Van Boom, M. C. Tromp, Major transcript of the frameshifted coxII gene from trypanosome mitochondria contains four nucleotides that are not encoded in the DNA. *Cell* **46**, 819–826 (1986).
5. A. L. Chateigner-Boutin, I. Small, Organellar RNA editing. *Wiley Interdiscip Rev. RNA* **2**, 493–506 (2011).
6. U. G. Maier, A. Bozarth, H. T. Funk, S. Zauner, S. A. Rensing, C. Schmitz-Linneweber, T. Borner, M. Tillich, Complex chloroplast RNA metabolism: Just debugging the genetic programme? *BMC Biol.* **6**, 36 (2008).
7. B. Castandet, A. Araya, The nucleocytoplasmic conflict, a driving force for the emergence of plant organellar RNA editing. *IUBMB Life* **64**, 120–125 (2012).
8. M. W. Gray, Evolutionary Origin of RNA Editing. *Biochemistry* **51**, 5235–5242 (2012).
9. D. Jiang, J. Zhang, The preponderance of nonsynonymous A-to-I RNA editing in coleoids is nonadaptive. *Nat. Commun.* **10**, 5411 (2019).
10. N. Tian, X. Wu, Y. Zhang, Y. Jin, A-to-I editing sites are a genomically encoded G: Implications for the evolutionary significance and identification of novel editing sites. *RNA* **14**, 211–216 (2008).
11. A. Wright, B. Vissel, The essential role of AMPA receptor GluR2 subunit RNA editing in the normal and diseased brain. *Front. Mol. Neurosci.* **5**, (2012).

12. J. Lukes, J. M. Archibald, P. J. Keeling, W. F. Doolittle, M. W. Gray, How a Neutral Evolutionary Ratchet Can Build Cellular Complexity. *IUBMB Life* **63**, 528–537 (2011).
13. H. Liu, Q. Wang, Y. He, L. Chen, C. Hao, C. Jiang, Y. Li, Y. Dai, Z. Kang, J. R. Xu, Genome-wide A-to-I RNA editing in fungi independent of ADAR enzymes. *Genome Res.* **26**, 499–509 (2016).
14. I. Teichert, T. A. Dahlmann, U. Kuck, M. Nowrousian, RNA Editing During Sexual Development Occurs in Distantly Related Filamentous Ascomycetes. *Genome Biol. Evol.* **9**, 855–868 (2017).
15. C. Feng, K. Xin, Y. Du, J. Zou, X. Xing, Q. Xiu, Y. Zhang, R. Zhang, W. Huang, Q. Wang, Unveiling the A-to-I mRNA editing machinery and its regulation and evolution in fungi. bioRxiv 2023.10.18.562923. [Preprint]. 19 October 2023. <https://doi.org/10.1101/2023.10.18.562923>.
16. L. Peraza-Reyes, F. Malagnac, 16 Sexual Development in Fungi. *Growth Differ. Sexual.*, 407–455 (2016).
17. S. A. West, R. M. Fisher, A. Gardner, E. T. Kiers, Major evolutionary transitions in individuality. *Proc. Natl. Acad. Sci. U.S.A.* **112**, 10112–10119 (2015).
18. H. Liu, Y. Li, D. Chen, Z. Qi, Q. Wang, J. Wang, C. Jiang, J. R. Xu, A-to-I RNA editing is developmentally regulated and generally adaptive for sexual reproduction in *Neurospora crassa*. *Proc. Natl. Acad. Sci. U.S.A.* **114**, E7756–E7765 (2017).
19. C. Feng, X. Cao, Y. Du, Y. Chen, K. Xin, J. Zou, Q. Jin, J. R. Xu, H. Liu, Uncovering Cis-regulatory elements important for a-to-i rna editing in fusarium graminearum *mBio*, **13** e0187222 (2022).
20. A. A. Maklakov, T. Chapman, Evolution of ageing as a tangle of trade-offs: Energy versus function. *P. Roy. Soc. B-Biol. Sci.* **286**, 20191604 (2019)
21. D. Yanni, S. Jacobeen, P. Marquez-Zacarias, J. S. Weitz, W. C. Ratcliff, P. J. Yunker, Topological constraints in early multicellularity favor reproductive division of labor. *eLife* **9**, (2020).
22. R. E. Michod, The group covariance effect and fitness trade-offs during evolutionary transitions in individuality. *Proc. Natl. Acad. Sci. U.S.A.* **103**, 9113–9117 (2006).

23. J. P. Bernardes, U. John, N. Woltermann, M. Valiadi, R. J. Hermann, L. Becks, The evolution of convex trade-offs enables the transition towards multicellularity. *Nat. Commun.* **12**, 4222 (2021).
24. L. G. Nagy, T. Varga, A. Csernetics, M. Viragh, Fungi took a unique evolutionary route to multicellularity: Seven key challenges for fungal multicellular life. *Fungal Biol. Rev.* **34**, 151–169 (2020).
25. G. I. Lang, A. W. Murray, D. Botstein, The cost of gene expression underlies a fitness trade-off in yeast. *Proc. Natl. Acad. Sci. U.S.A.* **106**, 5755–5760 (2009).
26. A. T. Avelar, L. Perfeito, I. Gordo, M. G. Ferreira, Genome architecture is a selectable trait that can be maintained by antagonistic pleiotropy. *Nat. Commun.* **4**, 2235 (2013).
27. S. N. Austad, J. M. Hoffman, Is antagonistic pleiotropy ubiquitous in aging biology? *Evol. Med. Public Health*, **2018**, 287–294 (2018).
28. T. Flatt, Life-history evolution and the genetics of fitness components in *drosophila melanogaster*. *Genetics* **214**, 3–48 (2020).
29. R. M. S. Saggere, C. W. J. Lee, I. C. W. Chan, D. G. Durnford, A. M. Nedelcu, A life-history trade-off gene with antagonistic pleiotropic effects on reproduction and survival in limiting environments. *Proc. Biol. Sci.* **289**, 20212669 (2022).
30. F. Trail, For blighted waves of grain: *Fusarium graminearum* in the postgenomics era. *Plant Physiol.* **149**, 103–110 (2009).
31. P. Lu, D. Chen, Z. Qi, H. Wang, Y. Chen, Q. Wang, C. Jiang, J. R. Xu, H. Liu, Landscape and regulation of alternative splicing and alternative polyadenylation in a plant pathogenic fungus. *New Phytol.* **235**, 674–689 (2022).
32. K. Xin, Y. Zhang, L. Fan, Z. Qi, C. Feng, Q. Wang, C. Jiang, J. R. Xu, H. Liu, Experimental evidence for the functional importance and adaptive advantage of A-to-I RNA editing in fungi. *Proc. Natl. Acad. Sci. U.S.A.* **120**, e2219029120 (2023).

33. C. J. Oldfield, A. K. Dunker, Intrinsically disordered proteins and intrinsically disordered protein regions. *Annu. Rev. Biochem.* **83**, 553–584 (2014).
34. C. F. Hao, J. R. Yin, M. L. Sun, Q. H. Wang, J. Liang, Z. Y. Bian, H. Q. Liu, J.-R. Xu, The meiosis-specific APC activator FgAMA1 is dispensable for meiosis but important for ascosporeogenesis in *Fusarium graminearum*. *Mol. Microbiol.* **111**, 1245–1262 (2019).
35. S. L. Cao, Y. He, C. F. Hao, Y. Xu, H. C. Zhang, C. F. Wang, H. Q. Liu, J. R. Xu, RNA editing of the AMD1 gene is important for ascus maturation and ascospore discharge in *Fusarium graminearum*. *Sci. Rep.* **7**, (2017).
36. K. R. Pomraning, L. R. Connolly, J. P. Whalen, K. M. Smith, M. Freitag, Repeat-induced point mutation, DNA methylation and heterochromatin in *Gibberella zeae* (anamorph: *Fusarium graminearum*). *Fusarium Genomics, Mol. Cell. Biol.*, **93**, 193 (2013).
37. C. Wang, J. R. Xu, H. Liu, A-to-I RNA editing independent of ADARs in filamentous fungi. *RNA Biol.* **13**, 940–945 (2016).
38. S. J. Heasman, A. J. Ridley, Mammalian Rho GTPases: New insights into their functions from in vivo studies. *Nat. Rev. Mol. Cell Biol.* **9**, 690–701 (2008).
39. M. Lussier, A. M. Sdicu, H. Bussey, The KTR and MNN1 mannosyltransferase families of *Saccharomyces cerevisiae*. *Biochim. Biophys. Acta* **1426**, 323–334 (1999).
40. B. M. Gumbiner, Cell adhesion: The molecular basis of tissue architecture and morphogenesis. *Cell* **84**, 345–357 (1996).
41. X. Wang, M. Xu, C. Gao, Y. Zeng, Y. Cui, W. Shen, L. Jiang, The roles of endomembrane trafficking in plant abiotic stress responses. *J. Integr. Plant Biol.* **62**, 55–69 (2020).
42. N. D. Read, A. Beckett, Ascus and ascospore morphogenesis. *Mycol. Res.* **100**, 1281–1314 (1996).
43. C. F. Bento, C. Puri, K. Moreau, D. C. Rubinsztein, The role of membrane-trafficking small GTPases in the regulation of autophagy. *J. Cell Sci.* **126**, 1059–1069 (2013).

44. K. Soreng, T. P. Neufeld, A. Simonsen, Membrane trafficking in autophagy. *Int. Rev. Cell Mol. Biol.* **336**, 1–92 (2018).
45. J. Lin, E. Epel, Stress and telomere shortening: Insights from cellular mechanisms. *Ageing Res. Rev.* **73**, 101507 (2022).
46. K. Karbstein, Role of GTPases in ribosome assembly. *Biopolymers* **87**, 1–11 (2007).
47. V. V. Hauryliuk, GTPases of the prokaryotic translation apparatus. *Mol. Biol.* **40**, 688–701 (2006).
48. Q. Wang, J. Groenendyk, M. Michalak, Glycoprotein quality control and endoplasmic reticulum stress. *Molecules* **20**, 13689–13704 (2015).
49. M. A. Naranjo-Ortiz, T. Gabaldon, Fungal evolution: Cellular, genomic and metabolic complexity. *Biol. Rev.* **95**, 1198–1232 (2020).
50. L. G. Nagy, G. M. Kovacs, K. Krizsan, Complex multicellularity in fungi: Evolutionary convergence, single origin, or both? *Biol. Rev. Camb. Philos. Soc.* **93**, 1778–1794 (2018).
51. A. H. Knoll, The Multiple Origins of Complex Multicellularity. *Annu. Rev. Earth Pl. Sc.* **39**, 217–239 (2011).
52. T. Brunet, N. King, The origin of animal multicellularity and cell differentiation. *Dev. Cell* **43**, 124–140 (2017).
53. T. A. Nguyen, O. H. Cisse, J. Yun Wong, P. Zheng, D. Hewitt, M. Nowrousian, J. E. Stajich, G. Jedd, Innovation and constraint leading to complex multicellularity in the Ascomycota. *Nat. Commun.* **8**, 14444 (2017).
54. E. Kiss, B. Hegedus, M. Viragh, T. Varga, Z. Merenyi, T. Koszo, B. Balint, A. N. Prasanna, K. Krizsan, S. Kocsube, M. Riquelme, N. Takeshita, L. G. Nagy, Comparative genomics reveals the origin of fungal hyphae and multicellularity. *Nat. Commun.* **10**, 4080 (2019).
55. R. Lutkenhaus, S. Traeger, J. Breuer, L. Carrete, A. Kuo, A. Lipzen, J. Pangilinan, D. Dilworth, L. Sandor, S. Poggeler, T. Gabaldon, K. Barry, I. V. Grigoriev, M. Nowrousian, Comparative genomics

and transcriptomics to analyze fruiting body development in filamentous ascomycetes. *Genetics* **213**, 1545–1563 (2019).

56. K. Krizsan, E. Almasi, Z. Merenyi, N. Sahu, M. Viragh, T. Koszo, S. Mondo, B. Kiss, B. Balint, U. Kues, K. Barry, J. Cseklye, B. Hegedus, B. Henrissat, J. Johnson, A. Lipzen, R. A. Ohm, I. Nagy, J. Pangilinan, J. Yan, Y. Xiong, I. V. Grigoriev, D. S. Hibbett, L. G. Nagy, Transcriptomic atlas of mushroom development reveals conserved genes behind complex multicellularity in fungi. *Proc. Natl. Acad. Sci. U.S.A.* **116**, 7409–7418 (2019).
57. M. T. Revilla-Guarinos, R. Martin-Garcia, M. A. Villar-Tajadura, M. Estravis, P. M. Coll, P. Perez, Rga6 is a fission yeast rho gap involved in cdc42 regulation of polarized growth. *Mol. Biol. Cell* **27**, 1524–1535 (2016).
58. B. P. Nieuwenhuis, T. Y. James, The frequency of sex in fungi. *Philos. Trans. R. Soc. Lond. B Biol. Sci.* **371**, 20150540 (2016).
59. A. M. Nedelcu, R. E. Michod, Stress Responses Co-Opted for Specialized Cell Types During the Early Evolution of Multicellularity. *Bioessays* **42**, 2000029 (2020).
60. A. Love, G. P. Wagner, Co-option of stress mechanisms in the origin of evolutionary novelties. *Evolution* **76**, 394–413 (2022).
61. W. Qian, D. Ma, C. Xiao, Z. Wang, J. Zhang, The genomic landscape and evolutionary resolution of antagonistic pleiotropy in yeast. *Cell Rep.* **2**, 1399–1410 (2012).
62. A. A. Maklakov, T. Chapman, Evolution of ageing as a tangle of trade-offs: Energy versus function. *Proc. Biol. Sci.* **286**, 20191604 (2019).
63. Z. Wang, J. Zhang, Impact of gene expression noise on organismal fitness and the efficacy of natural selection. *Proc. Natl. Acad. Sci. U.S.A.* **108**, E67–76 (2011).
64. K. F. Cooper, M. J. Mallory, D. B. Egeland, M. Jarnik, R. Strich, Ama1p is a meiosis-specific regulator of the anaphase promoting complex/cyclosome in yeast. *Proc. Natl. Acad. Sci. U.S.A.* **97**, 14548–14553 (2000).

65. J. C. Havird, E. S. Forsythe, A. M. Williams, J. H. Werren, D. K. Dowling, D. B. Sloan, Selfish Mitonuclear Conflict. *Curr. Biol.* **29**, R496-R511 (2019).
66. F. Ghiselli, L. Milani, Linking the mitochondrial genotype to phenotype: A complex endeavour. *Philos T R Soc B* **375**, (2020), 20190169.
67. I. Small, J. Melonek, A. V. Bohne, J. Nickelsen, C. Schmitz-Linneweber, Plant organellar RNA maturation. *Plant Cell* **35**, 1727–1751 (2023).
68. C. Wang, S. Zhang, R. Hou, Z. Zhao, Q. Zheng, Q. Xu, D. Zheng, G. Wang, H. Liu, X. Gao, J. W. Ma, H. C. Kistler, Z. Kang, J. R. Xu, Functional analysis of the kinome of the wheat scab fungus *Fusarium graminearum*. *PLOS Pathog.* **7**, e1002460 (2011).
69. B. Cavinder, U. Sikhakolli, K. M. Fellows, F. Trail, Sexual development and ascospore discharge in *Fusarium graminearum*. *J. Vis. Exp.*, 3895 (2012).
70. N. L. Catlett, B.-N. Lee, O. Yoder, B. G. Turgeon, Split-marker recombination for efficient targeted deletion of fungal genes. *Fungal Genetics Newsletter*, **50**, 9–11 (2003).
71. M. Perte, D. Kim, G. M. Perte, J. T. Leek, S. L. Salzberg, Transcript-level expression analysis of RNA-seq experiments with HISAT, StringTie and Ballgown, *Nat. Protoc.* **11**, 1650–1667 (2016).
72. K. Okonechnikov, A. Conesa, F. Garcia-Alcalde, Qualimap 2: Advanced multi-sample quality control for high-throughput sequencing data. *Bioinformatics* **32**, 292–294 (2016).
73. H. Liu, J. R. Xu, Discovering RNA Editing Events in Fungi. *Methods Mol. Biol.* **2181**, 35–50 (2021).
74. Y. Liao, G. K. Smyth, W. Shi, featureCounts: An efficient general purpose program for assigning sequence reads to genomic features. *Bioinformatics* **30**, 923–930 (2014).
75. E. Dimont, J. Shi, R. Kirchner, W. Hide, edgeRun: An R package for sensitive, functionally relevant differential expression discovery using an unconditional exact test. *Bioinformatics* **31**, 2589–2590 (2015).

76. C. Chen, H. Chen, Y. Zhang, H. R. Thomas, M. H. Frank, Y. He, R. Xia, TBtools: An Integrative Toolkit Developed for Interactive Analyses of Big Biological Data. *Mol. Plant* **13**, 1194–1202 (2020).
77. D. M. Geiser, A. M. S. Al-Hatmi, T. Aoki, T. Arie, V. Balmas, I. Barnes, G. C. Bergstrom, M. K. Bhattacharyya, C. L. Blomquist, R. L. Bowden, B. Brankovics, D. W. Brown, L. W. Burgess, K. Bushley, M. Busman, J. F. Cano-Lira, J. D. Carrillo, H.-X. Chang, C.-Y. Chen, W. Chen, M. Chilvers, S. Chulze, J. J. Coleman, C. A. Cuomo, Z. Wilhelm de Beer, G. S. de Hoog, J. Del Castillo-Múnera, E. M. Del Ponte, J. Diéguez-Uribeondo, A. D. Pietro, V. Edel-Hermann, W. H. Elmer, L. Epstein, A. Eskalen, M. C. Esposto, K. L. Everts, S. P. Fernández-Pavía, Gilvan Ferreira da Silva, N. A. Foroud, G. Fourie, R. J. N. Frandsen, S. Freeman, M. Freitag, O. Frenkel, K. K. Fuller, T. Gagkaeva, D. M. Gardiner, A. E. Glenn, S. E. Gold, T. R. Gordon, N. F. Gregory, M. Gryzenhout, J. Guarro, B. K. Gugino, S. Gutierrez, K. E. Hammond-Kosack, L. J. Harris, M. Homa, C.-F. Hong, L. Hornok, J.-W. Huang, M. Ilkit, A. Jacobs, K. Jacobs, C. Jiang, M. D. M. Jiménez-Gasco, S. Kang, M. T. Kasson, K. Kazan, J. C. Kennell, H.-S. Kim, H. Corby Kistler, G. A. Kuldau, T. Kulik, O. Kurzai, I. Laraba, M. H. Laurence, T. Lee, Y.-W. Lee, Y.-H. Lee, J. F. Leslie, E. C. Y. Liew, L. W. Lofton, A. F. Logrieco, M. S. López-Berges, A. G. Luque, E. Lysøe, L.-J. Ma, R. E. Marra, F. N. Martin, S. R. May, S. P. Mc Cormick, C. M. Gee, J. F. Meis, Q. Migheli, N. M. I. M. Nor, M. Monod, A. Moretti, D. Mostert, G. Mulè, F. Munaut, G. P. Munkvold, P. Nicholson, M. Nucci, K. O'Donnell, M. Pasquali, L. H. Pfenning, A. Prigitano, R. H. Proctor, S. Ranque, S. A. Rehner, M. Rep, G. Rodríguez-Alvarado, L. J. Rose, M. G. Roth, C. Ruiz-Roldán, A. A. Saleh, B. Salleh, H. Sang, M. M. Scandiani, J. Scauflaire, David G Schmale, D. P. G. Short, A. Šišić, J. A. Smith, C. W. Smyth, H. Son, E. Spahr, J. E. Stajich, E. Steenkamp, C. Steinberg, R. Subramaniam, H. Suga, B. A. Summerell, A. Susca, C. L. Swett, C. Toomajian, T. J. Torres-Cruz, A. M. Tortorano, M. Urban, L. J. Vaillancourt, G. E. Vallad, Theo A J van der Lee, D. Vanderpool, A. D. van Diepeningen, M. M. Vaughan, E. Venter, M. Vermeulen, P. E. Verweij, A. Viljoen, C. Waalwijk, E. C. Wallace, G. Walther, J. Wang, T. J. Ward, B. L. Wickes, N. P. Wiederhold, M. J. Wingfield, A. K. M. Wood, J.-R. Xu, X.-B. Yang, T. Yli-Mattila, S.-H. Yun, L. Zakaria, H. Zhang, N. Zhang, S. X. Zhang, X. Zhang, Phylogenomic Analysis of a 55.1-kb 19-Gene Dataset Resolves a Monophyletic *Fusarium* that Includes the *Fusarium solani* Species Complex. *Phytopathology* **111**, 1064–1079 (2021).

78. R. She, J. S. Chu, B. Uyar, J. Wang, K. Wang, N. Chen, genBlastG: Using BLAST searches to build homologous gene models. *Bioinformatics* **27**, 2141–2143 (2011).
79. Z. Zhao, H. Liu, Y. Luo, S. Zhou, L. An, C. Wang, Q. Jin, M. Zhou, J. R. Xu, Molecular evolution and functional divergence of tubulin superfamily in the fungal tree of life. *Sci. Rep.* **4**, 6746 (2014).
80. K. Tamura, G. Stecher, S. Kumar, MEGA11: Molecular evolutionary genetics analysis version 11. *Mol. Biol. Evol.* **38**, 3022–3027 (2021).
81. C. A. Cuomo, U. Gueldener, J. R. Xu, F. Trail, B. G. Turgeon, A. Di Pietro, J. D. Walton, L. J. Ma, S. E. Baker, M. Rep, G. Adam, J. Antoniw, T. Baldwin, S. Calvo, Y. L. Chang, D. DeCaprio, L. R. Gale, S. Gnerre, R. S. Goswami, K. Hammond-Kosack, L. J. Harris, K. Hilburn, J. C. Kennell, S. Kroken, J. K. Magnuson, G. Mannhaupt, E. Mauceli, H. W. Mewes, R. Mitterbauer, G. Muehlbauer, M. Munsterkotter, D. Nelson, K. O'Donnell, T. Ouellet, W. H. Qi, H. Quesneville, M. I. G. Roncero, K. Y. Seong, I. V. Tetko, M. Urban, C. Waalwijk, T. J. Ward, J. Q. Yao, B. W. Birren, H. C. Kistler, The *Fusarium graminearum* Genome reveals a link between localized polymorphism and pathogen specialization. *Science* **317**, 1400–1402 (2007).
82. C. Jiang, S. Cao, Z. Wang, H. Xu, J. Liang, H. Liu, G. Wang, M. Ding, Q. Wang, C. Gong, C. Feng, C. Hao, J. R. Xu, An expanded subfamily of G-protein-coupled receptor genes in *Fusarium graminearum* required for wheat infection. *Nat. Microbiol.* **4**, 1582–1591 (2019).
83. W. Kim, B. Cavinder, R. H. Proctor, K. O'Donnell, J. P. Townsend, F. Trail, Comparative Genomics and Transcriptomics During Sexual Development Gives Insight Into the Life History of the Cosmopolitan Fungus *Fusarium neocosmosporiellum*. *Front. Microbiol.* **10**, 1247 (2019).

## REFERENCES

1. J. Lukes, B. Kaur, D. Speijer, RNA editing in mitochondria and plastids: Weird and widespread. *Trends Genet.* **37**, 99–102 (2021).
2. Z. Bian, Y. Ni, J. R. Xu, H. Liu, A-to-I mRNA editing in fungi: Occurrence, function, and evolution. *Cell. Mol. Life Sci.* **76**, 329–340 (2019).
3. E. Eisenberg, E. Y. Levanon, A-to-I RNA editing - immune protector and transcriptome diversifier. *Nat. Rev. Genet.* **19**, 473–490 (2018).
4. R. Benne, J. Van den Burg, J. P. Brakenhoff, P. Sloof, J. H. Van Boom, M. C. Tromp, Major transcript of the frameshifted coxII gene from trypanosome mitochondria contains four nucleotides that are not encoded in the DNA. *Cell* **46**, 819–826 (1986).
5. A. L. Chateigner-Boutin, I. Small, Organellar RNA editing. *Wiley Interdiscip Rev. RNA* **2**, 493–506 (2011).
6. U. G. Maier, A. Bozarth, H. T. Funk, S. Zauner, S. A. Rensing, C. Schmitz-Linneweber, T. Borner, M. Tillich, Complex chloroplast RNA metabolism: Just debugging the genetic programme? *BMC Biol.* **6**, 36 (2008).
7. B. Castandet, A. Araya, The nucleocytoplasmic conflict, a driving force for the emergence of plant organellar RNA editing. *IUBMB Life* **64**, 120–125 (2012).
8. M. W. Gray, Evolutionary Origin of RNA Editing. *Biochemistry* **51**, 5235–5242 (2012).
9. D. Jiang, J. Zhang, The preponderance of nonsynonymous A-to-I RNA editing in coleoids is nonadaptive. *Nat. Commun.* **10**, 5411 (2019).
10. N. Tian, X. Wu, Y. Zhang, Y. Jin, A-to-I editing sites are a genomically encoded G: Implications for the evolutionary significance and identification of novel editing sites. *RNA* **14**, 211–216 (2008).
11. A. Wright, B. Vissel, The essential role of AMPA receptor GluR2 subunit RNA editing in the normal and diseased brain. *Front. Mol. Neurosci.* **5**, (2012).

12. J. Lukes, J. M. Archibald, P. J. Keeling, W. F. Doolittle, M. W. Gray, How a Neutral Evolutionary Ratchet Can Build Cellular Complexity. *IUBMB Life* **63**, 528–537 (2011).
13. H. Liu, Q. Wang, Y. He, L. Chen, C. Hao, C. Jiang, Y. Li, Y. Dai, Z. Kang, J. R. Xu, Genome-wide A-to-I RNA editing in fungi independent of ADAR enzymes. *Genome Res.* **26**, 499–509 (2016).
14. I. Teichert, T. A. Dahlmann, U. Kuck, M. Nowrousian, RNA Editing During Sexual Development Occurs in Distantly Related Filamentous Ascomycetes. *Genome Biol. Evol.* **9**, 855–868 (2017).
15. C. Feng, K. Xin, Y. Du, J. Zou, X. Xing, Q. Xiu, Y. Zhang, R. Zhang, W. Huang, Q. Wang, Unveiling the A-to-I mRNA editing machinery and its regulation and evolution in fungi. bioRxiv 2023.10.18.562923. [Preprint]. 19 October 2023. <https://doi.org/10.1101/2023.10.18.562923>.
16. L. Peraza-Reyes, F. Malagnac, 16 Sexual Development in Fungi. *Growth Differ. Sexual.*, 407–455 (2016).
17. S. A. West, R. M. Fisher, A. Gardner, E. T. Kiers, Major evolutionary transitions in individuality. *Proc. Natl. Acad. Sci. U.S.A.* **112**, 10112–10119 (2015).
18. H. Liu, Y. Li, D. Chen, Z. Qi, Q. Wang, J. Wang, C. Jiang, J. R. Xu, A-to-I RNA editing is developmentally regulated and generally adaptive for sexual reproduction in *Neurospora crassa*. *Proc. Natl. Acad. Sci. U.S.A.* **114**, E7756–E7765 (2017).
19. C. Feng, X. Cao, Y. Du, Y. Chen, K. Xin, J. Zou, Q. Jin, J. R. Xu, H. Liu, Uncovering Cis-regulatory elements important for a-to-i rna editing in fusarium graminearum *mBio*, **13** e0187222 (2022).
20. A. A. Maklakov, T. Chapman, Evolution of ageing as a tangle of trade-offs: Energy versus function. *P. Roy. Soc. B-Biol. Sci.* **286**, 20191604 (2019)
21. D. Yanni, S. Jacobeen, P. Marquez-Zacarias, J. S. Weitz, W. C. Ratcliff, P. J. Yunker, Topological constraints in early multicellularity favor reproductive division of labor. *eLife* **9**, (2020).
22. R. E. Michod, The group covariance effect and fitness trade-offs during evolutionary transitions in individuality. *Proc. Natl. Acad. Sci. U.S.A.* **103**, 9113–9117 (2006).

23. J. P. Bernardes, U. John, N. Woltermann, M. Valiadi, R. J. Hermann, L. Becks, The evolution of convex trade-offs enables the transition towards multicellularity. *Nat. Commun.* **12**, 4222 (2021).
24. L. G. Nagy, T. Varga, A. Csernetics, M. Viragh, Fungi took a unique evolutionary route to multicellularity: Seven key challenges for fungal multicellular life. *Fungal Biol. Rev.* **34**, 151–169 (2020).
25. G. I. Lang, A. W. Murray, D. Botstein, The cost of gene expression underlies a fitness trade-off in yeast. *Proc. Natl. Acad. Sci. U.S.A.* **106**, 5755–5760 (2009).
26. A. T. Avelar, L. Perfeito, I. Gordo, M. G. Ferreira, Genome architecture is a selectable trait that can be maintained by antagonistic pleiotropy. *Nat. Commun.* **4**, 2235 (2013).
27. S. N. Austad, J. M. Hoffman, Is antagonistic pleiotropy ubiquitous in aging biology? *Evol. Med. Public Health*, **2018**, 287–294 (2018).
28. T. Flatt, Life-history evolution and the genetics of fitness components in *drosophila melanogaster*. *Genetics* **214**, 3–48 (2020).
29. R. M. S. Saggere, C. W. J. Lee, I. C. W. Chan, D. G. Durnford, A. M. Nedelcu, A life-history trade-off gene with antagonistic pleiotropic effects on reproduction and survival in limiting environments. *Proc. Biol. Sci.* **289**, 20212669 (2022).
30. F. Trail, For blighted waves of grain: *Fusarium graminearum* in the postgenomics era. *Plant Physiol.* **149**, 103–110 (2009).
31. P. Lu, D. Chen, Z. Qi, H. Wang, Y. Chen, Q. Wang, C. Jiang, J. R. Xu, H. Liu, Landscape and regulation of alternative splicing and alternative polyadenylation in a plant pathogenic fungus. *New Phytol.* **235**, 674–689 (2022).
32. K. Xin, Y. Zhang, L. Fan, Z. Qi, C. Feng, Q. Wang, C. Jiang, J. R. Xu, H. Liu, Experimental evidence for the functional importance and adaptive advantage of A-to-I RNA editing in fungi. *Proc. Natl. Acad. Sci. U.S.A.* **120**, e2219029120 (2023).

33. C. J. Oldfield, A. K. Dunker, Intrinsically disordered proteins and intrinsically disordered protein regions. *Annu. Rev. Biochem.* **83**, 553–584 (2014).
34. C. F. Hao, J. R. Yin, M. L. Sun, Q. H. Wang, J. Liang, Z. Y. Bian, H. Q. Liu, J.-R. Xu, The meiosis-specific APC activator FgAMA1 is dispensable for meiosis but important for ascosporeogenesis in *Fusarium graminearum*. *Mol. Microbiol.* **111**, 1245–1262 (2019).
35. S. L. Cao, Y. He, C. F. Hao, Y. Xu, H. C. Zhang, C. F. Wang, H. Q. Liu, J. R. Xu, RNA editing of the AMD1 gene is important for ascus maturation and ascospore discharge in *Fusarium graminearum*. *Sci. Rep.* **7**, (2017).
36. K. R. Pomraning, L. R. Connolly, J. P. Whalen, K. M. Smith, M. Freitag, Repeat-induced point mutation, DNA methylation and heterochromatin in *Gibberella zeae* (anamorph: *Fusarium graminearum*). *Fusarium Genomics, Mol. Cell. Biol.*, **93**, 193 (2013).
37. C. Wang, J. R. Xu, H. Liu, A-to-I RNA editing independent of ADARs in filamentous fungi. *RNA Biol.* **13**, 940–945 (2016).
38. S. J. Heasman, A. J. Ridley, Mammalian Rho GTPases: New insights into their functions from in vivo studies. *Nat. Rev. Mol. Cell Biol.* **9**, 690–701 (2008).
39. M. Lussier, A. M. Sdicu, H. Bussey, The KTR and MNN1 mannosyltransferase families of *Saccharomyces cerevisiae*. *Biochim. Biophys. Acta* **1426**, 323–334 (1999).
40. B. M. Gumbiner, Cell adhesion: The molecular basis of tissue architecture and morphogenesis. *Cell* **84**, 345–357 (1996).
41. X. Wang, M. Xu, C. Gao, Y. Zeng, Y. Cui, W. Shen, L. Jiang, The roles of endomembrane trafficking in plant abiotic stress responses. *J. Integr. Plant Biol.* **62**, 55–69 (2020).
42. N. D. Read, A. Beckett, Ascus and ascospore morphogenesis. *Mycol. Res.* **100**, 1281–1314 (1996).
43. C. F. Bento, C. Puri, K. Moreau, D. C. Rubinsztein, The role of membrane-trafficking small GTPases in the regulation of autophagy. *J. Cell Sci.* **126**, 1059–1069 (2013).

44. K. Soreng, T. P. Neufeld, A. Simonsen, Membrane trafficking in autophagy. *Int. Rev. Cell Mol. Biol.* **336**, 1–92 (2018).
45. N. Casas-Vila, M. Scheibe, A. Freiwald, D. Kappei, F. Butter, Identification of TTAGGGbinding proteins in , a fungus with vertebrate-like telomere repeats. *Bmc Genomics* **16**, (2015).
46. J. Lin, E. Epel, Stress and telomere shortening: Insights from cellular mechanisms. *Ageing Res. Rev.* **73**, 101507 (2022).
47. K. Karbstein, Role of GTPases in ribosome assembly. *Biopolymers* **87**, 1–11 (2007).
48. V. V. Hauryliuk, GTPases of the prokaryotic translation apparatus. *Mol. Biol.* **40**, 688–701 (2006).
49. Q. Wang, J. Groenendyk, M. Michalak, Glycoprotein quality control and endoplasmic reticulum stress. *Molecules* **20**, 13689–13704 (2015).
50. M. A. Naranjo-Ortiz, T. Gabaldon, Fungal evolution: Cellular, genomic and metabolic complexity. *Biol. Rev.* **95**, 1198–1232 (2020).
51. L. G. Nagy, G. M. Kovacs, K. Krizsan, Complex multicellularity in fungi: Evolutionary convergence, single origin, or both? *Biol. Rev. Camb. Philos. Soc.* **93**, 1778–1794 (2018).
52. A. H. Knoll, The Multiple Origins of Complex Multicellularity. *Annu. Rev. Earth Pl. Sc.* **39**, 217–239 (2011).
53. T. Brunet, N. King, The origin of animal multicellularity and cell differentiation. *Dev. Cell* **43**, 124–140 (2017).
54. T. A. Nguyen, O. H. Cisse, J. Yun Wong, P. Zheng, D. Hewitt, M. Nowrousian, J. E. Stajich, G. Jedd, Innovation and constraint leading to complex multicellularity in the Ascomycota. *Nat. Commun.* **8**, 14444 (2017).
55. E. Kiss, B. Hegedus, M. Viragh, T. Varga, Z. Merenyi, T. Koszo, B. Balint, A. N. Prasanna, K. Krizsan, S. Kocsube, M. Riquelme, N. Takeshita, L. G. Nagy, Comparative genomics reveals the origin of fungal hyphae and multicellularity. *Nat. Commun.* **10**, 4080 (2019).

56. R. Lutkenhaus, S. Traeger, J. Breuer, L. Carrete, A. Kuo, A. Lipzen, J. Pangilinan, D. Dilworth, L. Sandor, S. Poggeler, T. Gabaldon, K. Barry, I. V. Grigoriev, M. Nowrousian, Comparative genomics and transcriptomics to analyze fruiting body development in filamentous ascomycetes. *Genetics* **213**, 1545–1563 (2019).
57. K. Krizsan, E. Almasi, Z. Merenyi, N. Sahu, M. Viragh, T. Koszo, S. Mondo, B. Kiss, B. Balint, U. Kues, K. Barry, J. Cseklye, B. Hegedus, B. Henrissat, J. Johnson, A. Lipzen, R. A. Ohm, I. Nagy, J. Pangilinan, J. Yan, Y. Xiong, I. V. Grigoriev, D. S. Hibbett, L. G. Nagy, Transcriptomic atlas of mushroom development reveals conserved genes behind complex multicellularity in fungi. *Proc. Natl. Acad. Sci. U.S.A.* **116**, 7409–7418 (2019).
58. M. T. Revilla-Guarinos, R. Martin-Garcia, M. A. Villar-Tajadura, M. Estravis, P. M. Coll, P. Perez, Rga6 is a fission yeast rho gap involved in cdc42 regulation of polarized growth. *Mol. Biol. Cell* **27**, 1524–1535 (2016).
59. B. P. Nieuwenhuis, T. Y. James, The frequency of sex in fungi. *Philos. Trans. R. Soc. Lond. B Biol. Sci.* **371**, 20150540 (2016).
60. A. M. Nedelcu, R. E. Michod, Stress Responses Co-Opted for Specialized Cell Types During the Early Evolution of Multicellularity. *Bioessays* **42**, 2000029 (2020).
61. A. Love, G. P. Wagner, Co-option of stress mechanisms in the origin of evolutionary novelties. *Evolution* **76**, 394–413 (2022).
62. W. Qian, D. Ma, C. Xiao, Z. Wang, J. Zhang, The genomic landscape and evolutionary resolution of antagonistic pleiotropy in yeast. *Cell Rep.* **2**, 1399–1410 (2012).
63. A. A. Maklakov, T. Chapman, Evolution of ageing as a tangle of trade-offs: Energy versus function. *Proc. Biol. Sci.* **286**, 20191604 (2019).
64. K. F. Cooper, M. J. Mallory, D. B. Egeland, M. Jarnik, R. Strich, Ama1p is a meiosis-specific regulator of the anaphase promoting complex/cyclosome in yeast. *Proc. Natl. Acad. Sci. U.S.A.* **97**, 14548–14553 (2000).

65. J. C. Havird, E. S. Forsythe, A. M. Williams, J. H. Werren, D. K. Dowling, D. B. Sloan, Selfish Mitonuclear Conflict. *Curr. Biol.* **29**, R496-R511 (2019).
66. F. Ghiselli, L. Milani, Linking the mitochondrial genotype to phenotype: A complex endeavour. *Philos T R Soc B* **375**, (2020), 20190169.
67. I. Small, J. Melonek, A. V. Bohne, J. Nickelsen, C. Schmitz-Linneweber, Plant organellar RNA maturation. *Plant Cell* **35**, 1727–1751 (2023).
68. C. Wang, S. Zhang, R. Hou, Z. Zhao, Q. Zheng, Q. Xu, D. Zheng, G. Wang, H. Liu, X. Gao, J. W. Ma, H. C. Kistler, Z. Kang, J. R. Xu, Functional analysis of the kinome of the wheat scab fungus *Fusarium graminearum*. *PLOS Pathog.* **7**, e1002460 (2011).
39. B. Cavinder, U. Sikhakolli, K. M. Fellows, F. Trail, Sexual development and ascospore discharge in *Fusarium graminearum*. *J. Vis. Exp.*, 3895 (2012).
70. N. L. Catlett, B.-N. Lee, O. Yoder, B. G. Turgeon, Split-marker recombination for efficient targeted deletion of fungal genes. *Fungal Genetics Newsletter*, **50**, 9–11 (2003).
71. M. Perte, D. Kim, G. M. Perte, J. T. Leek, S. L. Salzberg, Transcript-level expression analysis of RNA-seq experiments with HISAT, StringTie and Ballgown, *Nat. Protoc.* **11**, 1650–1667 (2016).
72. K. Okonechnikov, A. Conesa, F. Garcia-Alcalde, Qualimap 2: Advanced multi-sample quality control for high-throughput sequencing data. *Bioinformatics* **32**, 292–294 (2016).
73. H. Liu, J. R. Xu, Discovering RNA Editing Events in Fungi. *Methods Mol. Biol.* **2181**, 35–50 (2021).
74. Y. Liao, G. K. Smyth, W. Shi, featureCounts: An efficient general purpose program for assigning sequence reads to genomic features. *Bioinformatics* **30**, 923–930 (2014).
75. E. Dimont, J. Shi, R. Kirchner, W. Hide, edgeRun: An R package for sensitive, functionally relevant differential expression discovery using an unconditional exact test. *Bioinformatics* **31**, 2589–2590 (2015).

76. C. Chen, H. Chen, Y. Zhang, H. R. Thomas, M. H. Frank, Y. He, R. Xia, TBtools: An Integrative Toolkit Developed for Interactive Analyses of Big Biological Data. *Mol. Plant* **13**, 1194–1202 (2020).
77. D. M. Geiser, A. M. S. Al-Hatmi, T. Aoki, T. Arie, V. Balmas, I. Barnes, G. C. Bergstrom, M. K. Bhattacharyya, C. L. Blomquist, R. L. Bowden, B. Brankovics, D. W. Brown, L. W. Burgess, K. Bushley, M. Busman, J. F. Cano-Lira, J. D. Carrillo, H.-X. Chang, C.-Y. Chen, W. Chen, M. Chilvers, S. Chulze, J. J. Coleman, C. A. Cuomo, Z. Wilhelm de Beer, G. S. de Hoog, J. Del Castillo-Múnera, E. M. Del Ponte, J. Diéguez-Uribeondo, A. D. Pietro, V. Edel-Hermann, W. H. Elmer, L. Epstein, A. Eskalen, M. C. Esposto, K. L. Everts, S. P. Fernández-Pavía, Gilvan Ferreira da Silva, N. A. Foroud, G. Fourie, R. J. N. Frandsen, S. Freeman, M. Freitag, O. Frenkel, K. K. Fuller, T. Gagkaeva, D. M. Gardiner, A. E. Glenn, S. E. Gold, T. R. Gordon, N. F. Gregory, M. Gryzenhout, J. Guarro, B. K. Gugino, S. Gutierrez, K. E. Hammond-Kosack, L. J. Harris, M. Homa, C.-F. Hong, L. Hornok, J.-W. Huang, M. Ilkit, A. Jacobs, K. Jacobs, C. Jiang, M. D. M. Jiménez-Gasco, S. Kang, M. T. Kasson, K. Kazan, J. C. Kennell, H.-S. Kim, H. Corby Kistler, G. A. Kuldau, T. Kulik, O. Kurzai, I. Laraba, M. H. Laurence, T. Lee, Y.-W. Lee, Y.-H. Lee, J. F. Leslie, E. C. Y. Liew, L. W. Lofton, A. F. Logrieco, M. S. López-Berges, A. G. Luque, E. Lysøe, L.-J. Ma, R. E. Marra, F. N. Martin, S. R. May, S. P. Mc Cormick, C. M. Gee, J. F. Meis, Q. Migheli, N. M. I. M. Nor, M. Monod, A. Moretti, D. Mostert, G. Mulè, F. Munaut, G. P. Munkvold, P. Nicholson, M. Nucci, K. O'Donnell, M. Pasquali, L. H. Pfenning, A. Prigitano, R. H. Proctor, S. Ranque, S. A. Rehner, M. Rep, G. Rodríguez-Alvarado, L. J. Rose, M. G. Roth, C. Ruiz-Roldán, A. A. Saleh, B. Salleh, H. Sang, M. M. Scandiani, J. Scauflaire, David G Schmale, D. P. G. Short, A. Šišić, J. A. Smith, C. W. Smyth, H. Son, E. Spahr, J. E. Stajich, E. Steenkamp, C. Steinberg, R. Subramaniam, H. Suga, B. A. Summerell, A. Susca, C. L. Swett, C. Toomajian, T. J. Torres-Cruz, A. M. Tortorano, M. Urban, L. J. Vaillancourt, G. E. Vallad, Theo A J van der Lee, D. Vanderpool, A. D. van Diepeningen, M. M. Vaughan, E. Venter, M. Vermeulen, P. E. Verweij, A. Viljoen, C. Waalwijk, E. C. Wallace, G. Walther, J. Wang, T. J. Ward, B. L. Wickes, N. P. Wiederhold, M. J. Wingfield, A. K. M. Wood, J.-R. Xu, X.-B. Yang, T. Yli-Mattila, S.-H. Yun, L. Zakaria, H. Zhang, N. Zhang, S. X. Zhang, X. Zhang, Phylogenomic Analysis of a 55.1-kb 19-Gene Dataset Resolves a Monophyletic *Fusarium* that Includes the *Fusarium solani* Species Complex. *Phytopathology* **111**, 1064–1079 (2021).

78. R. She, J. S. Chu, B. Uyar, J. Wang, K. Wang, N. Chen, genBlastG: Using BLAST searches to build homologous gene models. *Bioinformatics* **27**, 2141–2143 (2011).
79. Z. Zhao, H. Liu, Y. Luo, S. Zhou, L. An, C. Wang, Q. Jin, M. Zhou, J. R. Xu, Molecular evolution and functional divergence of tubulin superfamily in the fungal tree of life. *Sci. Rep.* **4**, 6746 (2014).
80. K. Tamura, G. Stecher, S. Kumar, MEGA11: Molecular evolutionary genetics analysis version 11. *Mol. Biol. Evol.* **38**, 3022–3027 (2021).
81. C. A. Cuomo, U. Gueldener, J. R. Xu, F. Trail, B. G. Turgeon, A. Di Pietro, J. D. Walton, L. J. Ma, S. E. Baker, M. Rep, G. Adam, J. Antoniw, T. Baldwin, S. Calvo, Y. L. Chang, D. DeCaprio, L. R. Gale, S. Gnerre, R. S. Goswami, K. Hammond-Kosack, L. J. Harris, K. Hilburn, J. C. Kennell, S. Kroken, J. K. Magnuson, G. Mannhaupt, E. Mauceli, H. W. Mewes, R. Mitterbauer, G. Muehlbauer, M. Munsterkotter, D. Nelson, K. O'Donnell, T. Ouellet, W. H. Qi, H. Quesneville, M. I. G. Roncero, K. Y. Seong, I. V. Tetko, M. Urban, C. Waalwijk, T. J. Ward, J. Q. Yao, B. W. Birren, H. C. Kistler, The *Fusarium graminearum* Genome reveals a link between localized polymorphism and pathogen specialization. *Science* **317**, 1400–1402 (2007).
82. C. Jiang, S. Cao, Z. Wang, H. Xu, J. Liang, H. Liu, G. Wang, M. Ding, Q. Wang, C. Gong, C. Feng, C. Hao, J. R. Xu, An expanded subfamily of G-protein-coupled receptor genes in *Fusarium graminearum* required for wheat infection. *Nat. Microbiol.* **4**, 1582–1591 (2019).
83. W. Kim, B. Cavinder, R. H. Proctor, K. O'Donnell, J. P. Townsend, F. Trail, Comparative Genomics and Transcriptomics During Sexual Development Gives Insight Into the Life History of the Cosmopolitan Fungus *Fusarium neocosmosporiellum*. *Front. Microbiol.* **10**, 1247 (2019).
